# Supplementary material for: Enantioselective ring-opening of meso-epoxides by aromatic amines catalyzed by a homochiral metal–organic framework
Source: Royal Society of Chemistry journal article supplement (doi:10.1039/c3cc45988h), 2013-01-01
Supplement: c3cc45988h.pdf [file c3cc45988h.pdf]

Supporting Information for

## **Enantioselective Ring-Opening of meso-Epoxyde by Aromatic Amines Catalysed by a Homochiral Metal-Organic Framework**

Sridhar Regati, Yabing He, Muralidhara Thimmaiah, Peng Li, Shengchang Xiang, Banglin Chen\* and John Cong-Gui Zhao\*

### **General Information**

All reagents and solvents were used as received from commercial suppliers without further purification.  $^1\text{H}$  NMR and  $^{13}\text{C}$  NMR spectra were recorded on Bruker AV400 or AV600 spectrometer. Tetramethylsilane (TMS) and deuterated solvents ( $\text{CDCl}_3$ ,  $\delta = 77.0$  ppm;  $\text{DMSO-}d_6$ ,  $\delta = 39.5$  ppm) were used as internal standards in  $^1\text{H}$  NMR and  $^{13}\text{C}$  NMR experiments, respectively. The coupling constants were reported in Hertz. Thermogravimetric analyses (TGA) were measured using a Shimadzu TGA-50 analyzer under a nitrogen atmosphere with a heating rate of  $3\text{ }^\circ\text{C min}^{-1}$ . Powder X-ray diffraction (PXRD) patterns were recorded by a Rigaku Ultima IV diffractometer operated at 40 kV and 44 mA with a scan rate of  $1.0\text{ degmin}^{-1}$ .

The *cis*-stilbene epoxides used in this study were synthesized according to the reported literature procedures. They were purified either by column chromatography or distillation. Aniline and aniline derivatives were purified by distillation and recrystallization before use.

### **Crystal structure determination**

Intensity data for **UTSA-32** were collected at 185(2) K on a Bruker SMART Apex II CCD-based X-ray diffractometer system equipped with a Mo-target X-ray tube ( $\lambda = 0.71073\text{ \AA}$ ) operated at 2000 watts power (50 kV, 40 mA). The structure was solved by direct methods and subsequent difference Fourier syntheses, and refined using the SHELXTL software package. The H atoms on the ligands and coordinated  $\text{H}_2\text{O}$  were placed in idealized positions and refined using

a riding model. The unit cell includes a large region of disordered solvent molecules, which could not be modeled as discrete atomic sites. We employed PLATON/SQUEEZE to calculate the diffraction contribution of the solvent molecules and thereby, to produce a set of solvent-free diffraction intensities. Crystal data for **UTSA-32**:  $C_{40}H_{23}Cl_2O_{12}Zn_2$ ,  $M = 897.22$ , monoclinic, space group  $P2_1$ ,  $a = 10.1889(13)$  Å,  $b = 16.651(2)$  Å,  $c = 19.730(3)$  Å,  $\beta = 101.825(2)^\circ$ ,  $V = 3276.4(7)$  Å<sup>3</sup>,  $Z = 2$ ,  $D_c = 0.909$  g cm<sup>-3</sup>,  $\mu(\text{Mo-K}\alpha, \lambda = 0.71073 \text{ \AA}) = 0.851$  mm<sup>-1</sup>,  $F(000) = 906$ ,  $2\theta_{\text{max}} = 50.1$ , 17147 reflections collected, 9823 independent reflections ( $R_{\text{int}} = 0.0702$ ), which were used in all the calculations, Final  $R_1 = 0.0893$  for  $I > 2\sigma(I)$ ,  $wR_2 = 0.2404$  for all data, GOF = 0.943, Flack parameter = 0.10(3). CCDC 713157. See <http://www.rsc.org/suppdata/cc/> for crystallographic data in CIF or other electronic format.

### Synthesis of **UTSA-32**

A mixture of  $Zn(NO_3)_2 \cdot 6H_2O$  (15.0 mg, 0.050 mmol) and organic linker  $H_4L$  (15.0 mg, 0.020 mmol) was dissolved into *N,N'*-dimethylacetamide (DMA) (2.0 mL)-ethanol (1.0 mL) mixed solvents in a screw-capped vial. The vial was then capped and heated to 110 °C in 2 hours, maintained at 110 °C for 48 hours and cooled to room temperature in 12 hours. Colorless rodlike crystals were obtained in 62% yield. **UTSA-32** can be formulated as  $[Zn_2(L)(H_2O)_2] (DMA)_4$  on the basis of single crystal X-ray structure determination, TGA and microanalysis. TGA data: Calcd. weight loss for 4DMA and 2H<sub>2</sub>O: 30.7%, Found: 30.1%; Anal. Calcd for  $C_{56}H_{64}N_4O_{16}Zn_2Cl_2$ : C, 53.77; H, 5.16%; N, 4.48, Found: C, 53.89%; H, 5.22; N, 4.57%

### General Experimental Procedure for the *meso*-epoxide opening reaction with aniline derivatives

To a mixture of the epoxide (0.10 mmol) and aniline derivative (0.25 mmol) in a vial, 10 mol % of **UTSA-32a** catalyst was added followed by 1 mL of toluene (**UTSA-32a** was obtained by heating as-synthesized **UTSA-32** under high vacuum at 150 °C for 24 hrs). The vial was heated at 50 °C for the indicated time. The reaction mixture was cooled and filtered to remove the catalyst, washed with ethanol. The filtrate was evaporated under reduced pressure (rotary evaporator), and the residue was purified by column chromatography to give the product amino alcohol.

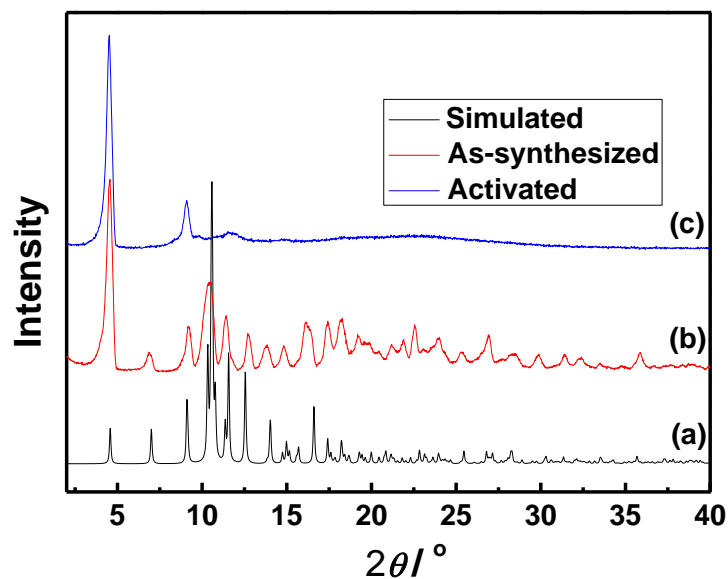

**Figure S1.** PXRD patterns of (a) as-synthesized UTSA-32 and (c) activated UTSA-32a, along with the simulated PXRD pattern from single X-ray crystal structure.

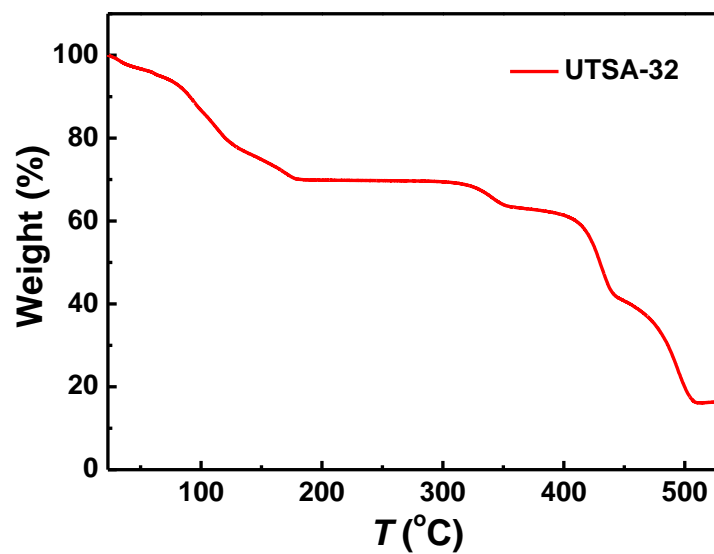

**Figure S2.** TGA curve of as-synthesized UTSA-32.

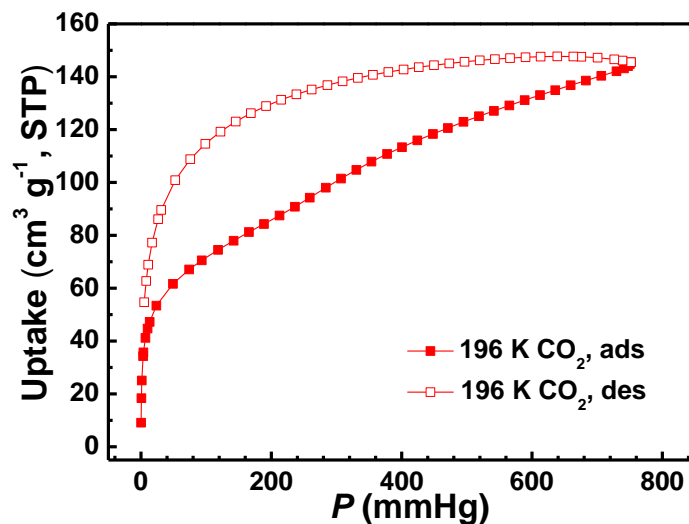

Figure S3. CO<sub>2</sub> sorption isotherm of UTSA-32a at 196 K.

### Additional References

1. Gao, B.; Wen, Y.; Yang, Z.; Huang, X.; Liu, X.; Feng, X. *Adv. Synth. Catal.*, **2008**, 350, 385.
2. Hou, X.L.; Wu, J.; Dai, L.X.; Xia, L.J.; Tang, M.H. *Tetrahedron: Asymmetry*. **1998**, 9, 1747.
3. Mai, E.; Schneider, C. *Chem. Eur. J.*, **2007**, 13, 2729.
4. Azoulay, S.; Manabe, K.; Kobayashi, S. *Org. Lett.* **2005**, 7, 21, 4593.
5. Schneider, C.; Sreekanth, A.R.; Mai, E. *Angew. Chem. Int. Ed.* **2004**, 43, 5691.
6. Kureshy, R. I.; Singh, S.; Khan, N. H.; Abdi, S. H. R.; Suresh, E.; Jasra, R. V. *Eur. J. Org. Chem.* **2006**, 1303.
7. Carree, F.; Gil, R.; Collin, J. *Org. Lett.* **2005**, 7, 6, 1023.

## Compound Characterization Data

**(1*s*,2*s*)-1,2-Diphenyl-2-(phenylamino)ethanol:**<sup>1,2</sup> <sup>1</sup>H NMR (500 MHz, CDCl<sub>3</sub>):  $\delta$  = 7.31-7.10

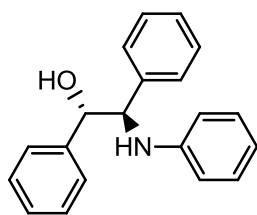

(m, 10H), 6.83-6.57 (m, 5H), 4.89 (d,  $J$  = 6.0 Hz, 1H), 4.56 (d,  $J$  = 6.0 Hz, 1H), 3.69 (brs, 1H). <sup>13</sup>C NMR (125 MHz, CDCl<sub>3</sub>):  $\delta$  = 146.5, 140.9, 140.5, 129.3, 128.8, 128.5, 128.1, 127.7, 127.5, 126.8, 118.1, 114.3, 78.3, 64.9.  $[\alpha]_D^{24}$  = -31.9° ( $c$  = 0.46, CH<sub>2</sub>Cl<sub>2</sub>, 85% *ee*). HPLC (Daicel Chiralcel<sup>®</sup> IB column, hexane/*i*-PrOH = 95/5, flow rate = 1 mL/min, 254 nm):  $t_R$  = 24.8

min (minor),  $t_R$  = 29.3 min (major).

**(1*s*,2*s*)-1,2-Diphenyl-2-(*p*-tolylamino)ethanol:**<sup>6</sup> <sup>1</sup>H NMR (500 MHz, CDCl<sub>3</sub>):  $\delta$  = 7.27-7.18 (m,

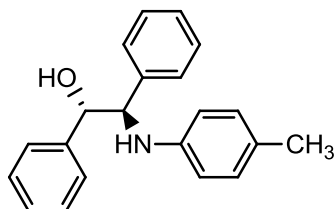

10H), 6.90-6.87 (m, 4H), 4.83 (d,  $J$  = 6 Hz, 1H), 4.48 (d,  $J$  = 6.3 Hz, 1H), 2.73 (brs, 1H), 2.19 (s, 3H). <sup>13</sup>C NMR (75 MHz, CDCl<sub>3</sub>):  $\delta$  = 147.4, 137.7, 137.5, 137.2, 137.0, 129.3, 129.1, 129.0, 127.2, 126.5, 117.8, 114.1, 78.0, 64.4, 21.4.  $[\alpha]_D^{24}$  = -37.9° ( $c$  = 0.43, CH<sub>2</sub>Cl<sub>2</sub>, 75% *ee*). HPLC (Daicel Chiralcel<sup>®</sup> IB column, hexane/*i*-PrOH = 95/5,

flow rate = 1 mL/min, 254 nm):  $t_R$  = 24.6 min (major), 26.4 min (minor).

**(1*s*,2*s*)-1,2-Diphenyl-2-(*p*-methoxyphenylamino)ethanol:**<sup>5</sup> <sup>1</sup>H NMR (500 MHz, CDCl<sub>3</sub>):  $\delta$  =

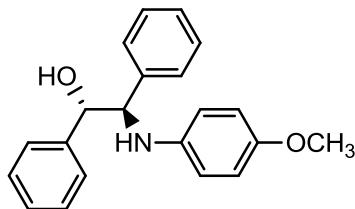

7.25-7.14 (m, 10H), 6.67-6.49 (m, 4H), 4.80 (d,  $J$  = 6.6 Hz, 1H), 4.40 (d,  $J$  = 6.6 Hz, 1H), 3.67 (s, 3H), 2.81 (brs, 1H). <sup>13</sup>C NMR (75 MHz, CDCl<sub>3</sub>):  $\delta$  = 152.6, 141.4, 140.7, 140.3, 128.6, 128.3, 128.0, 127.6, 127.5, 126.8, 115.9, 114.8, 78.3, 66.4, 55.9.  $[\alpha]_D^{24}$  = -28.9° ( $c$  = 0.39, CH<sub>2</sub>Cl<sub>2</sub>, 62% *ee*). HPLC (Daicel Chiralcel<sup>®</sup> AD-H

column, hexane/*i*-PrOH = 82/20, flow rate = 0.5 mL/min, 247 nm):  $t_R$  = 37.1 min (major),  $t_R$  = 45.2 min (minor).

**(1*s*,2*s*)-1,2-Diphenyl-2-(*p*-fluorophenylamino)ethanol:**<sup>1</sup> <sup>1</sup>H NMR (500 MHz, CDCl<sub>3</sub>):  $\delta$  =

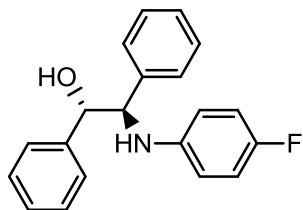

7.26-7.17 (m, 10H), 6.79-6.43 (m, 4H), 4.82 (d,  $J$  = 6.3 Hz, 1H), 4.60 (brs, 1H), 4.43 (d,  $J$  = 6.3 Hz, 1H), 3.67 (s, 3H), 2.61 (brs, 1H). <sup>13</sup>C NMR (75 MHz, CDCl<sub>3</sub>):  $\delta$  = 147.5, 140.8, 140.5, 129.2, 128.7, 128.4, 128.0, 127.7, 127.5, 126.8, 125.3, 115.3, 78.2, 64.9.  $[\alpha]_D^{24}$  = -43.5° ( $c$  = 0.42, CH<sub>2</sub>Cl<sub>2</sub>, 89% *ee*). HPLC (Daicel Chiralcel<sup>®</sup> IB column, hexane/*i*-

PrOH = 95/5, flow rate = 1 mL/min, 254 nm):  $t_R$  = 23.3 min (major),  $t_R$  = 26.5 min (minor).

**(1*s*,2*s*)-1,2-Diphenyl-2-(*p*-chlorophenylamino)ethanol:**<sup>1</sup> <sup>1</sup>H NMR (500 MHz, CDCl<sub>3</sub>): δ = 7.32-7.23 (m, 10H), 6.85-6.49 (m, 4H), 4.89 (d, *J* = 6.0 Hz, 1H), 4.66 (brs, 1H), 4.49 (d, *J* = 6.0 Hz, 1H). <sup>13</sup>C NMR (75 MHz, CDCl<sub>3</sub>): δ = 146.4, 140.8, 140.4, 129.2, 128.7, 128.4, 128.0, 127.6, 127.4, 126.7, 125.2, 115.3, 78.2, 64.8. [α]<sub>D</sub><sup>24</sup> = -22.1° (*c* = 0.375, CH<sub>2</sub>Cl<sub>2</sub>, 58% *ee*). HPLC (Daicel Chiralcel<sup>®</sup> AD-H column, hexane/*i*-PrOH = 95/5, flow rate = 1 mL/min, 247 nm): *t*<sub>R</sub> = 35.2 min (major), *t*<sub>R</sub> = 43.1 min (minor).

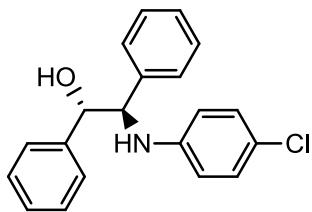

**(1*s*,2*s*)-1,2-Diphenyl-2-(*p*-bromophenylamino)ethanol:**<sup>1</sup> <sup>1</sup>H NMR (500 MHz, CDCl<sub>3</sub>): δ = 7.24-7.14(m, 10H), 6.77-6.41 (m, 4H), 4.80(d, *J* = 7.5 Hz, 1H), 4.57 (brs, 1H), 4.41 (d, *J* = 6.0 Hz, 1H), 2.59 (brs, 1H). <sup>13</sup>C NMR (75 MHz, CDCl<sub>3</sub>): δ = 147.7, 141.0, 140.7, 129.7, 128.9, 128.6, 128.2, 127.7, 126.9, 115.5, 114.5, 78.4, 65.1. [α]<sub>D</sub><sup>24</sup> = -41.4° (*c* = 0.49, CH<sub>2</sub>Cl<sub>2</sub>, 31% *ee*). HPLC (Daicel Chiralcel<sup>®</sup> AD-H column, hexane/*i*-PrOH = 90/10, flow rate = 1 mL/min, 254 nm): *t*<sub>R</sub> = 21.8 min (major), *t*<sub>R</sub> = 28.4 min (minor).

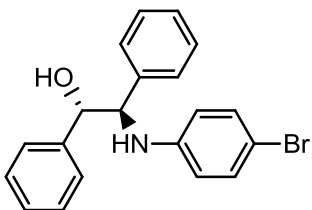

**(1*s*,2*s*)-2-Phenylaminocyclopentanol:**<sup>7</sup> <sup>1</sup>H NMR (500 MHz, CDCl<sub>3</sub>): δ = 7.19-7.16 (m, 2H), 6.72-6.66 (m, 2H), 4.08-4.06 (m, 1H), 3.61-3.56 (m, 1H), 2.30-2.17 (m, 1H), 2.01-1.95 (m, 1H), 1.84-1.64 (m, 3H), 1.43-1.38 (m, 1H). <sup>13</sup>C NMR (125 MHz, CDCl<sub>3</sub>): δ = 147.9, 129.4, 117.7, 113.4, 78.4, 62.2, 33.1, 31.4, 21.2. [α]<sub>D</sub><sup>24</sup> = 14.6° (*c* = 0.63, CH<sub>2</sub>Cl<sub>2</sub>, 12% *ee*). HPLC (Daicel Chiralcel<sup>®</sup> IB column, hexane/*i*-PrOH = 95/5, flow rate = 1 ml/min, 254 nm): *t*<sub>R</sub> = 26.3 min (major), *t*<sub>R</sub> = 29.4 min (minor).

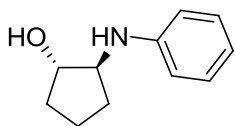

**(1*s*,2*s*)-2-Phenylaminocyclohexanol:**<sup>5</sup> <sup>1</sup>H NMR (500 MHz, CDCl<sub>3</sub>): δ = 7.20-7.14 (m, 2H), 6.76-6.71 (m, 2H), 3.35-3.33 (m, 1H), 3.16-3.14 (m, 1H), 2.75 (brs, 1H), 2.17-2.11 (m, 2H), 1.78-1.72 (m, 2H), 1.43-1.26 (m, 3H), 1.08-1.04 (m, 1H). <sup>13</sup>C NMR (125 MHz, CDCl<sub>3</sub>): δ = 147.9, 129.4, 117.7, 113.4, 78.4, 62.2, 33.1, 31.4, 21.2. [α]<sub>D</sub><sup>24</sup> = 29.3° (*c* = 0.48, CH<sub>2</sub>Cl<sub>2</sub>, 15% *ee*). HPLC (Daicel Chiralcel<sup>®</sup> IB column, hexane/*i*-PrOH = 95/5, flow rate = 1 ml/min, 254 nm): *t*<sub>R</sub> = 19.4 min (major), *t*<sub>R</sub> = 22.8 min (minor).

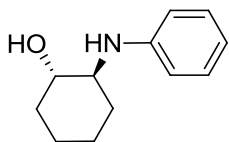

**(1*s*,2*s*)-1,2-bis(4-chlorophenyl)-2-(phenylamino)ethanol:**<sup>3</sup> <sup>1</sup>H NMR (500 MHz, CDCl<sub>3</sub>): δ = 7.28-7.05(m, 10H), 6.70-6.41 (m, 3H), 4.79-4.77(d, *J* = 6.0 Hz, 1H), 4.45-4.29 (d, *J* = 6.3 Hz, 1H), 2.63 (brs, 1H). <sup>13</sup>C NMR (75 MHz,

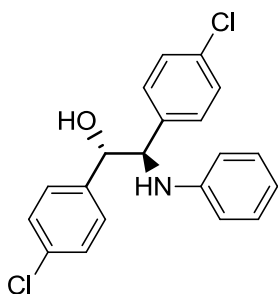

$\text{CDCl}_3$ ):  $\delta = 147.5, 137.8, 137.6, 137.4, 137.2, 129.4, 129.2, 129.1, 127.3, 126.6, 117.9, 114.2, 78.1, 64.5$ .  $[\alpha]_{\text{D}}^{24} = -19.2^\circ$  ( $c = 0.68, \text{CH}_2\text{Cl}_2, 34\% ee$ ). HPLC (Daicel Chiralcel<sup>®</sup> IB column, hexane/*i*-PrOH = 95/5, flow rate = 1 ml/min, 254 nm):  $t_{\text{R}} = 50.5$  min (major),  $t_{\text{R}} = 65.2$  min (minor).

**(1*s*,2*s*)-1,2-bis(*p*-tolyl)-2-(phenylamino)ethanol:**<sup>4</sup>  $^1\text{H}$  NMR (500 MHz,  $\text{CDCl}_3$ ):  $\delta = 7.26-$

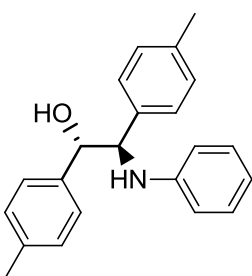

$7.04(\text{m}, 10\text{H}), 6.67-6.62 (\text{m}, 1\text{H}), 6.55-6.51(\text{m}, 2\text{H}), 4.84 (\text{d}, J = 5.4 \text{ Hz}, 1\text{H}), 4.64 (\text{brs}, 1\text{H}), 4.50 (\text{d}, J = 5.4 \text{ Hz}, 1\text{H}), 2.49 (\text{brs}, 1\text{H}), 2.34 (\text{s}, 3\text{H}), 2.32 (\text{s}, 3\text{H})$ .  $^{13}\text{C}$  NMR (75 MHz,  $\text{CDCl}_3$ ):  $\delta = 147.1, 137.4, 137.2, 137.0, 136.8, 129.1, 128.8, 128.7, 126.9, 126.2, 117.5, 113.8, 77.7, 64.1, 21.2, 21.1$ .  $[\alpha]_{\text{D}}^{24} = -31.9^\circ$  ( $c = 0.41, \text{CH}_2\text{Cl}_2, 17\% ee$ ). HPLC (Daicel Chiralcel<sup>®</sup> AD-H column, hexane/*i*-PrOH = 90/10, flow rate = 1 mL/min,

254 nm):  $t_{\text{R}} = 23.3$  min (major),  $t_{\text{R}} = 27.1$  min (minor).

**1*s*,2*s*)-1,2-di(naphthalen-2-yl)-2-(phenylamino)ethanol:**<sup>5</sup>  $^1\text{H}$  NMR (500 MHz,  $\text{CDCl}_3$ ):  $\delta =$

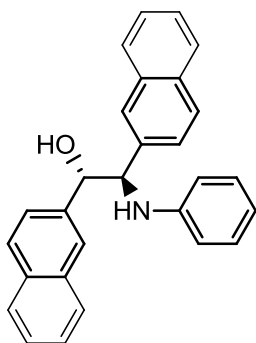

$7.28-7.04(\text{m}, 14\text{H}), 6.77-6.63 (\text{m}, 3\text{H}), 6.52-6.54(\text{m}, 2\text{H}), 4.88 (\text{d}, J = 6.0 \text{ Hz}, 1\text{H}), 4.53 (\text{d}, J = 5.5 \text{ Hz}, 1\text{H}), 3.74 (\text{brs}, 1\text{H})$ .  $^{13}\text{C}$  NMR (125 MHz,  $\text{CDCl}_3$ ):  $\delta = 147.2, 140.5, 140.1, 131.3, 129.7, 129.2, 129.1, 129.0, 128.8, 128.7, 128.5, 128.3, 128.2, 127.8, 127.4, 127.2, 126.5, 125.9, 117.8, 114.1, 78.0, 64.7$ .  $[\alpha]_{\text{D}}^{24} = -116.4^\circ$  ( $c = 0.31, \text{CH}_2\text{Cl}_2, 32\% ee$ ). HPLC (Daicel Chiralcel<sup>®</sup> AD-H column, hexane/*i*-PrOH = 90/10, flow rate = 1 mL/min, 254 nm):  $t_{\text{R}} = 23.5$  min (major),  $t_{\text{R}} = 30.5$  min (minor).

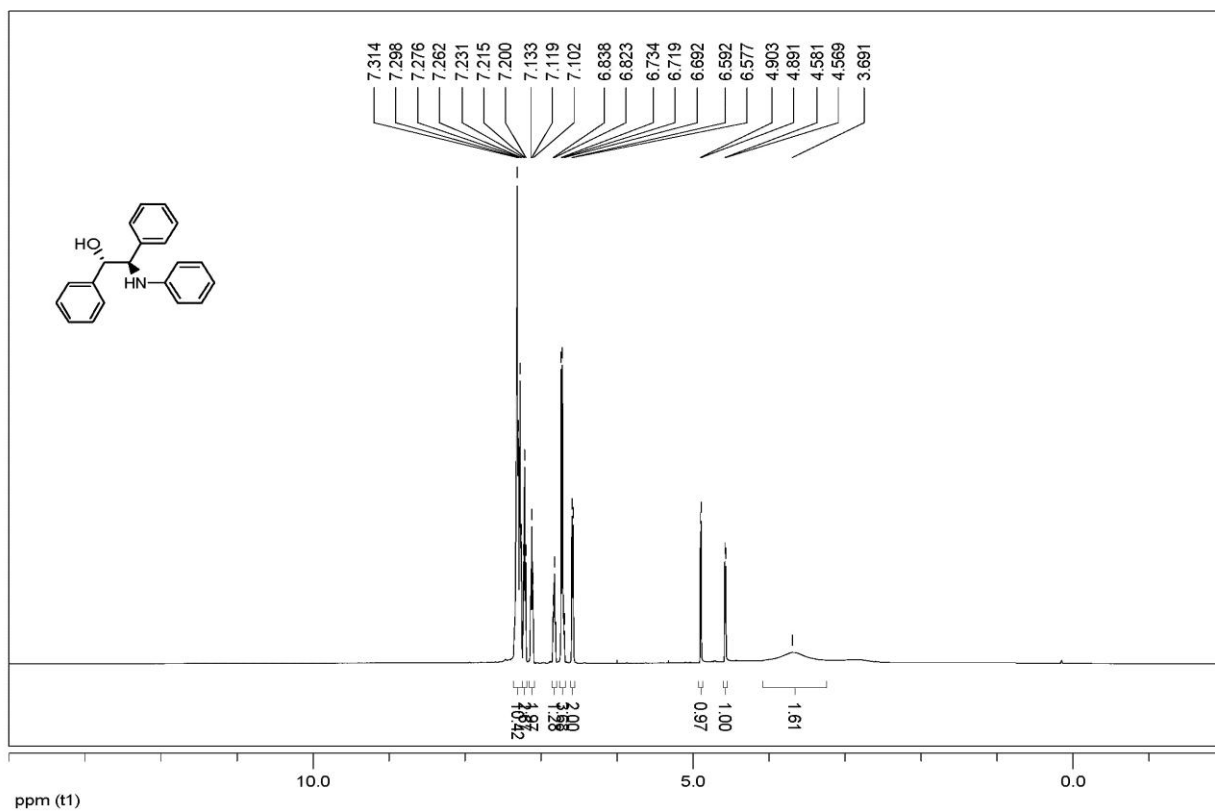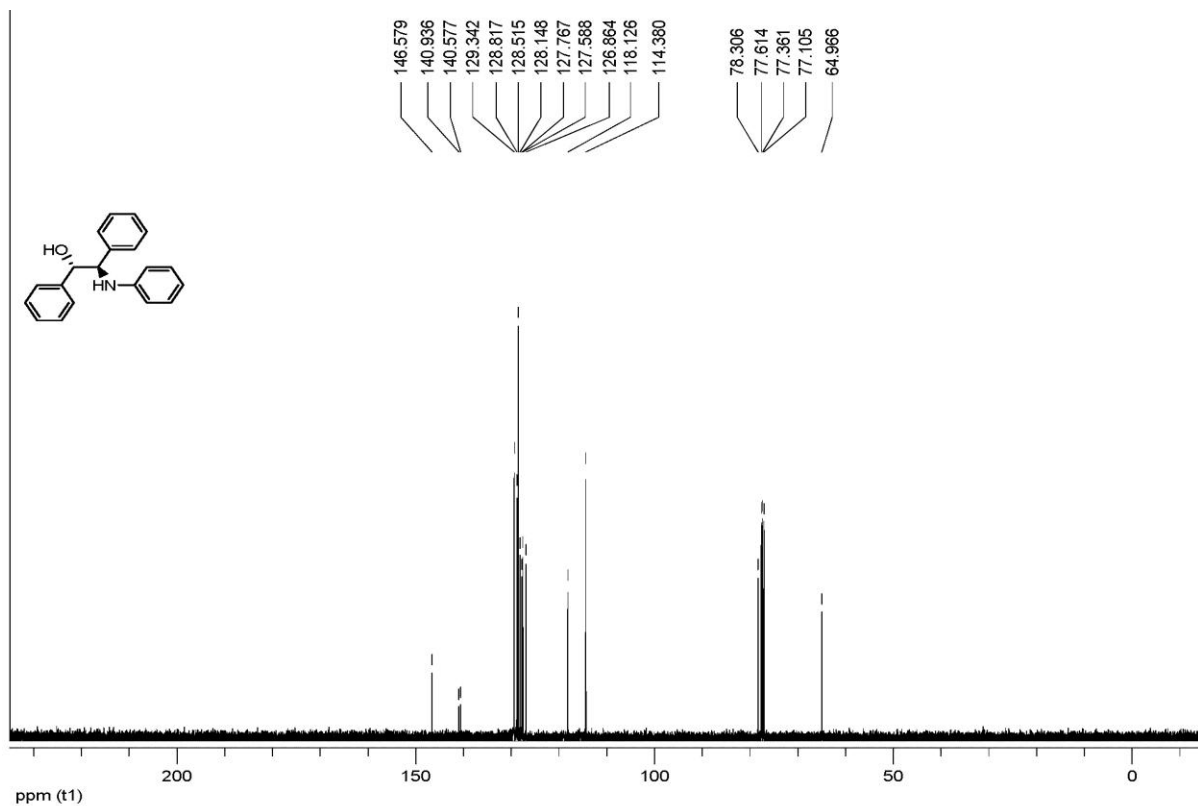



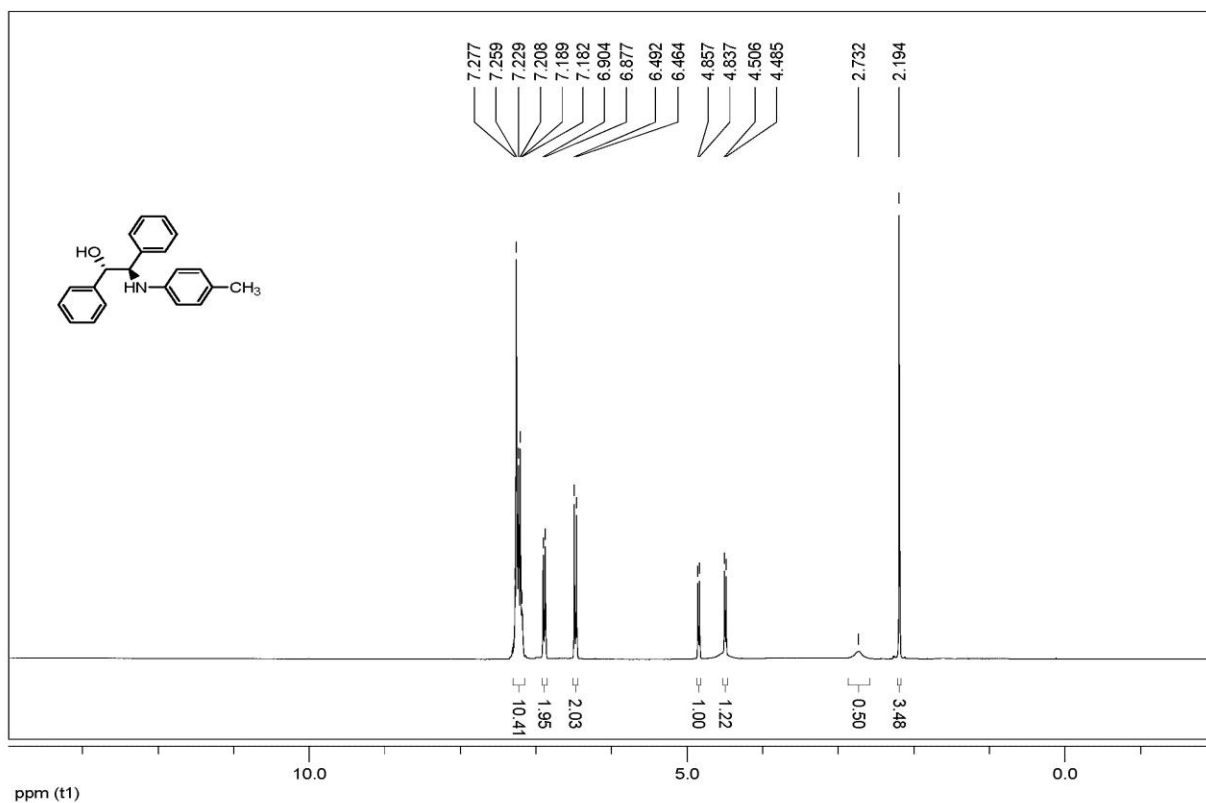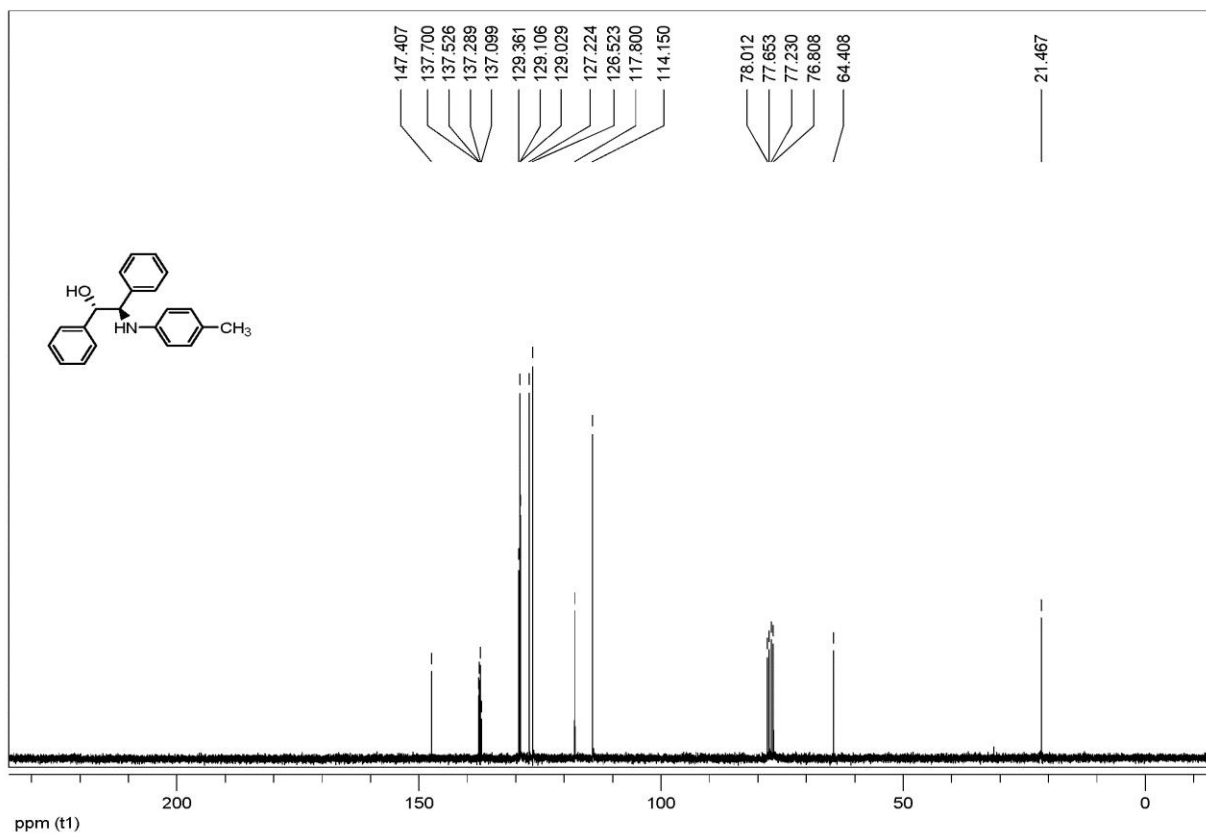

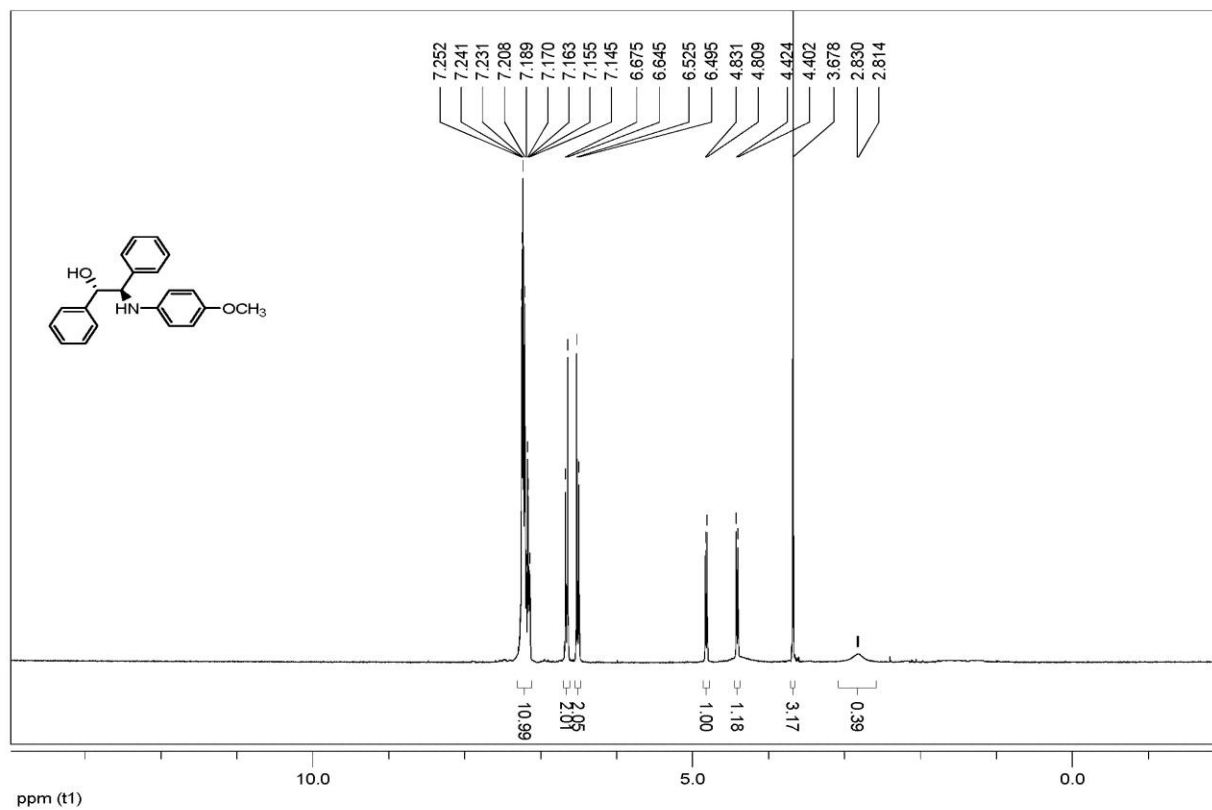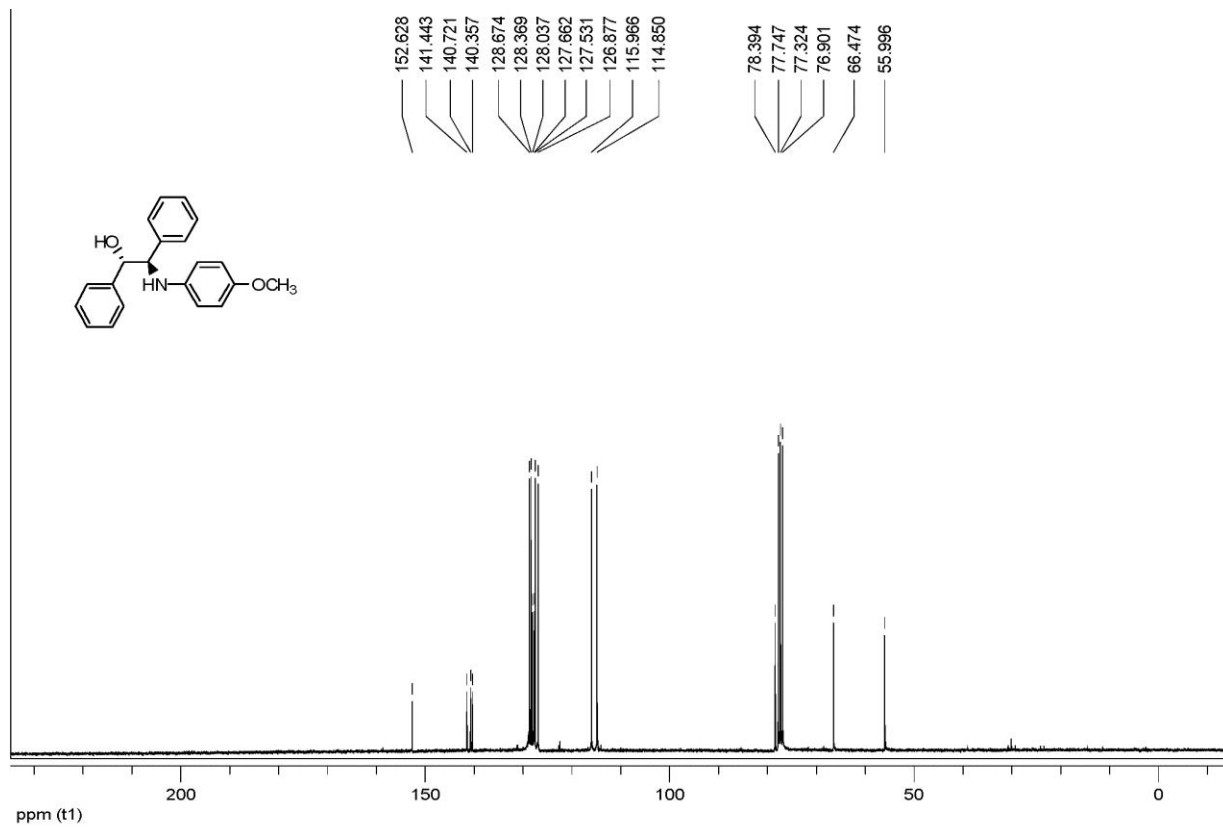

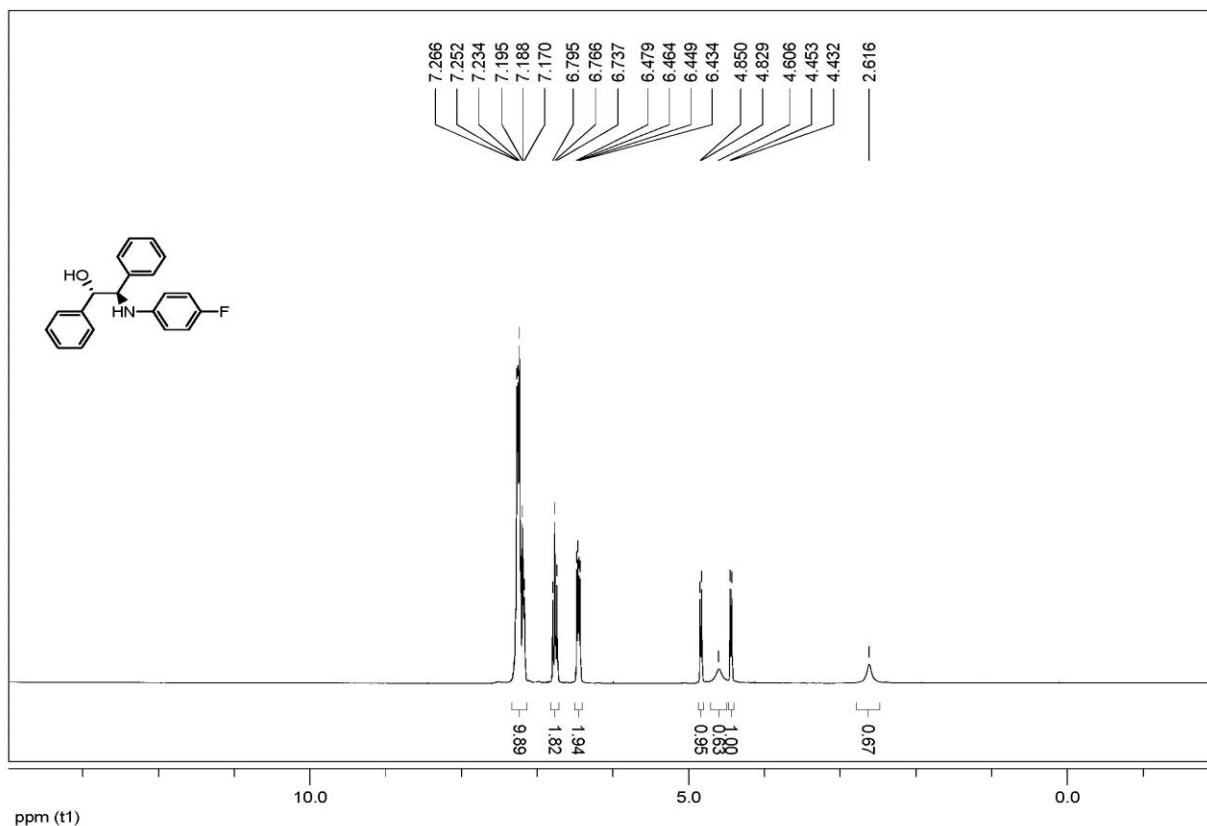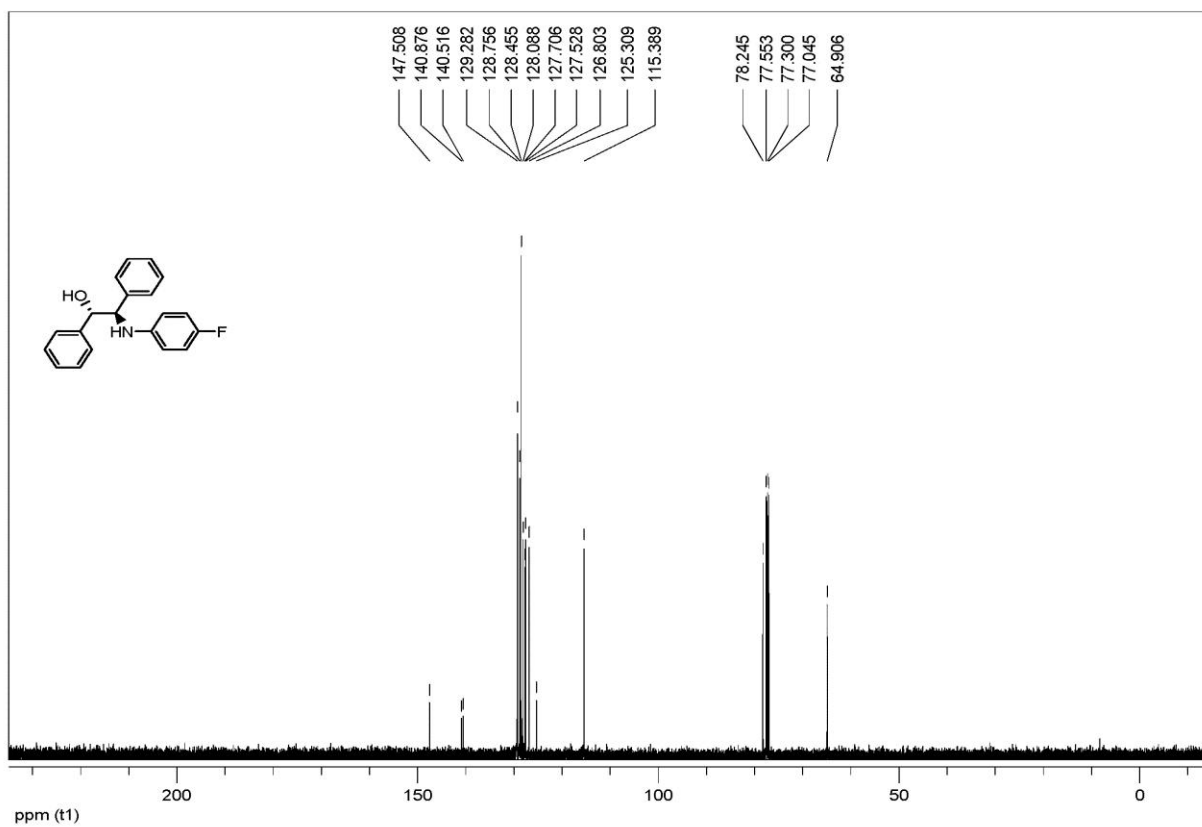

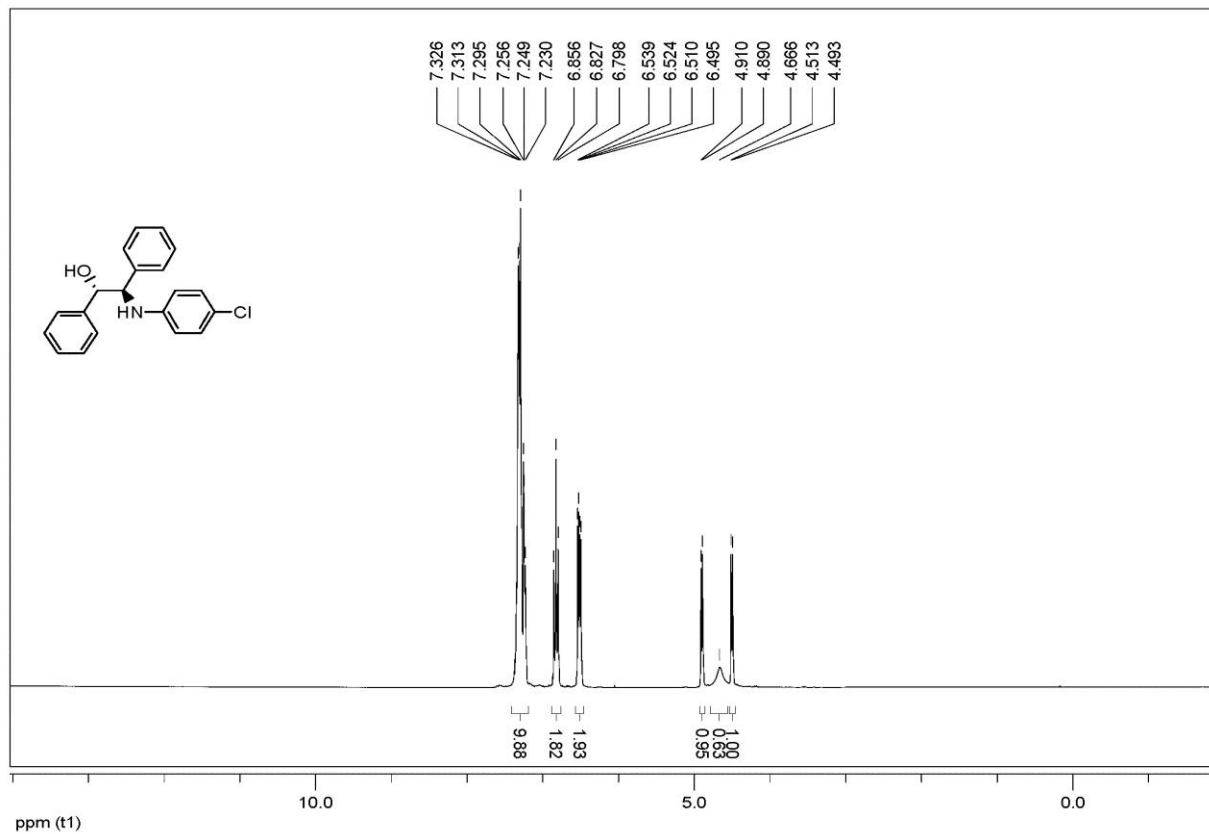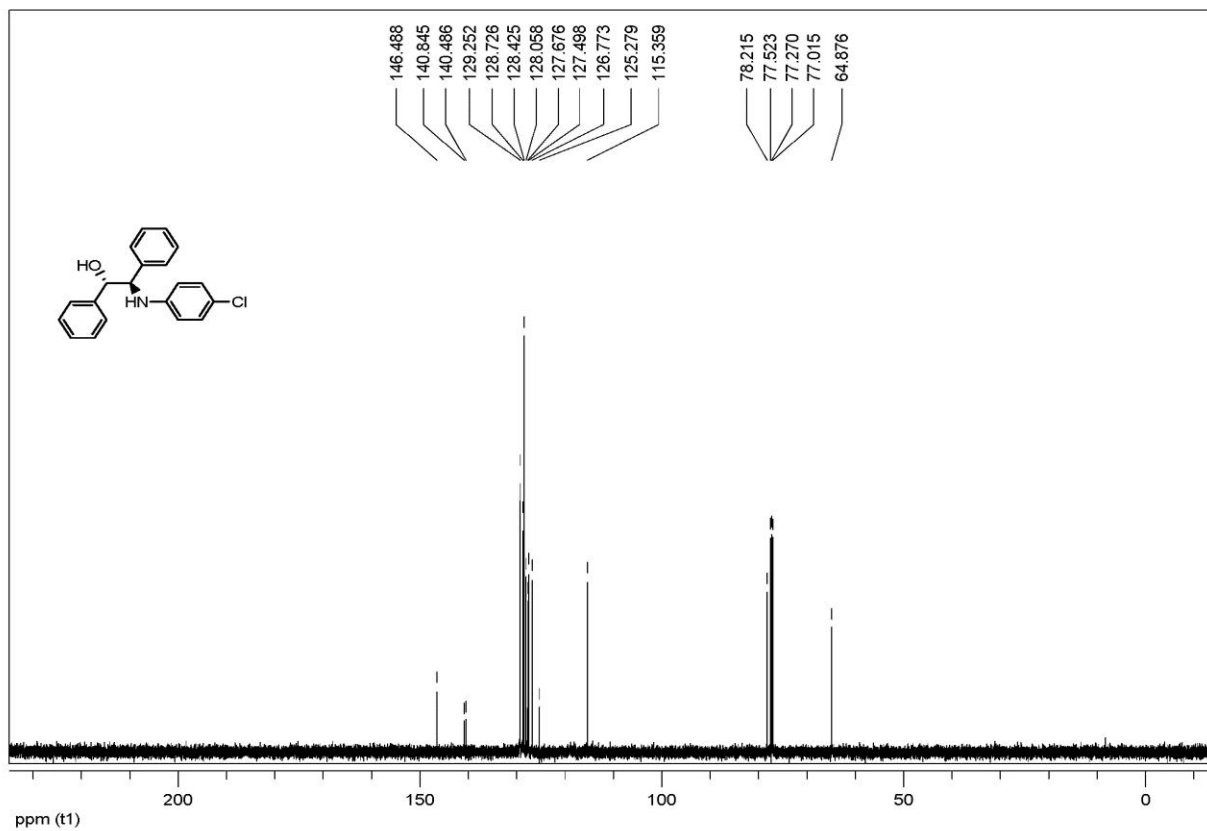

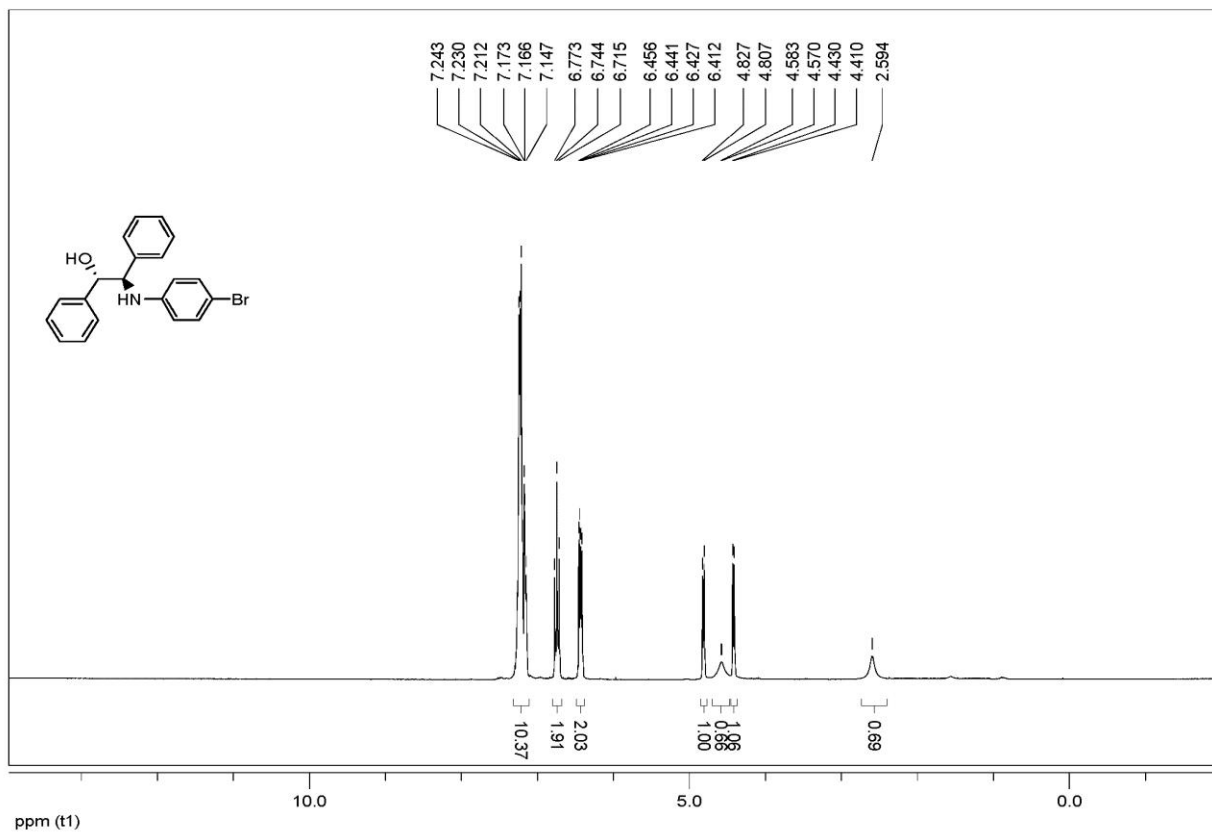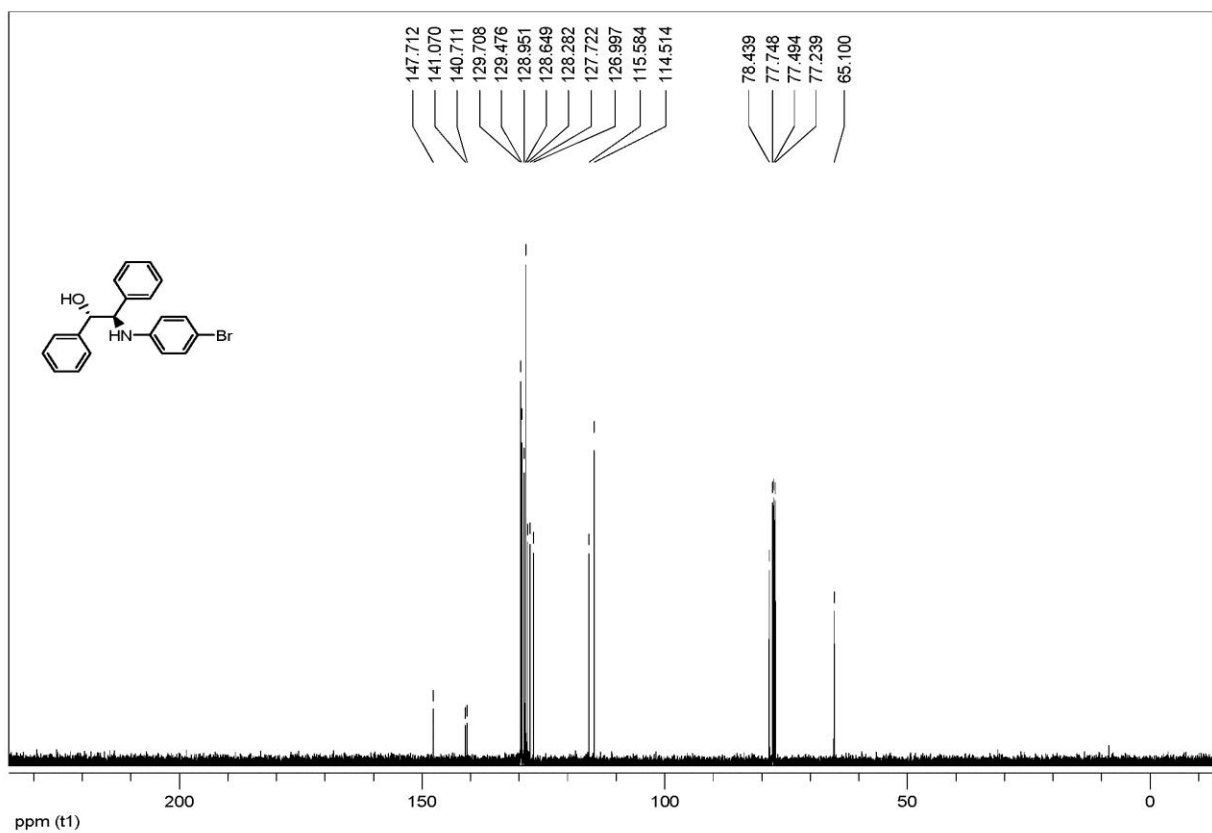



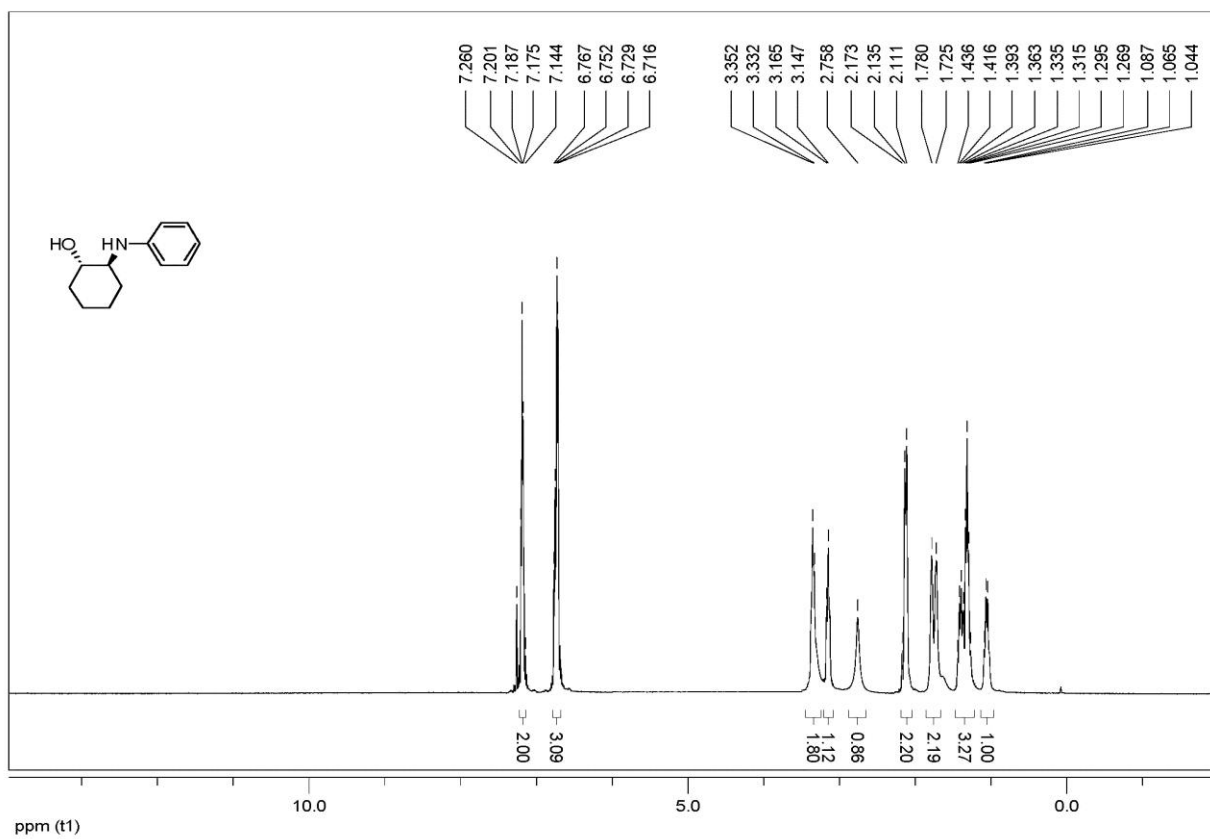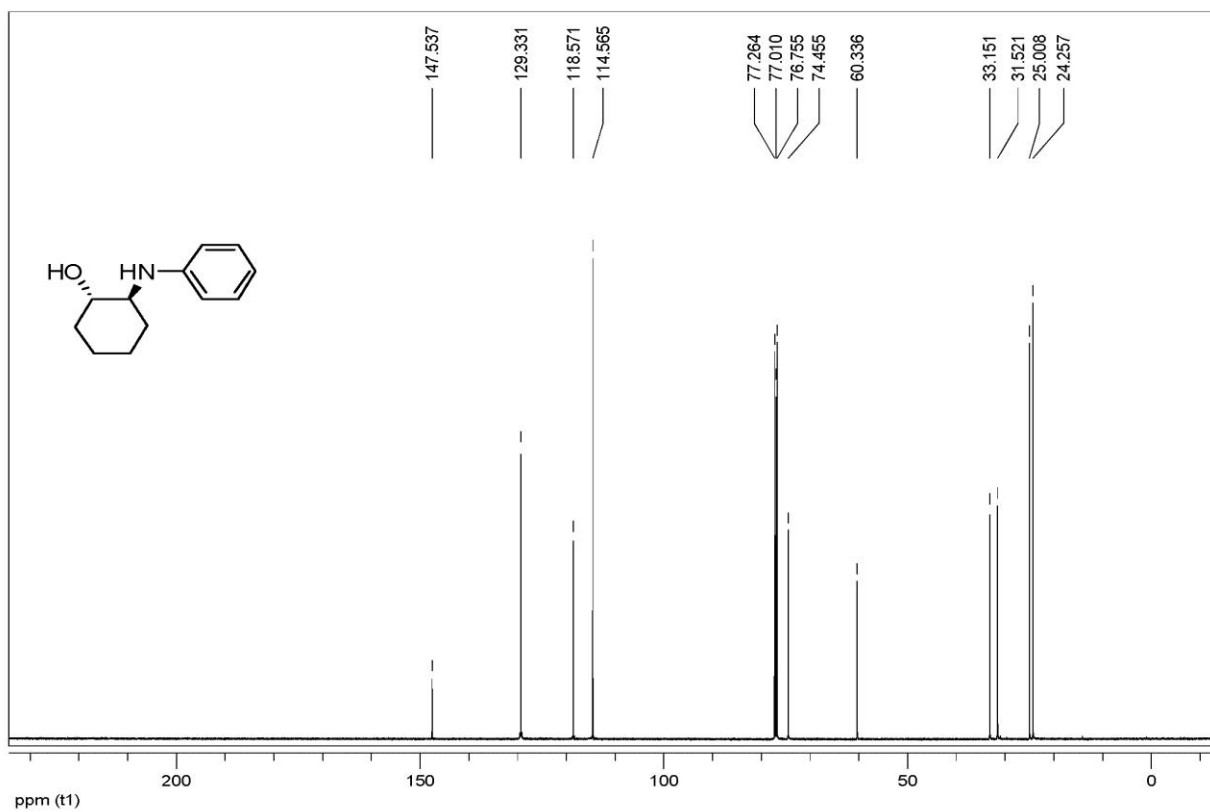

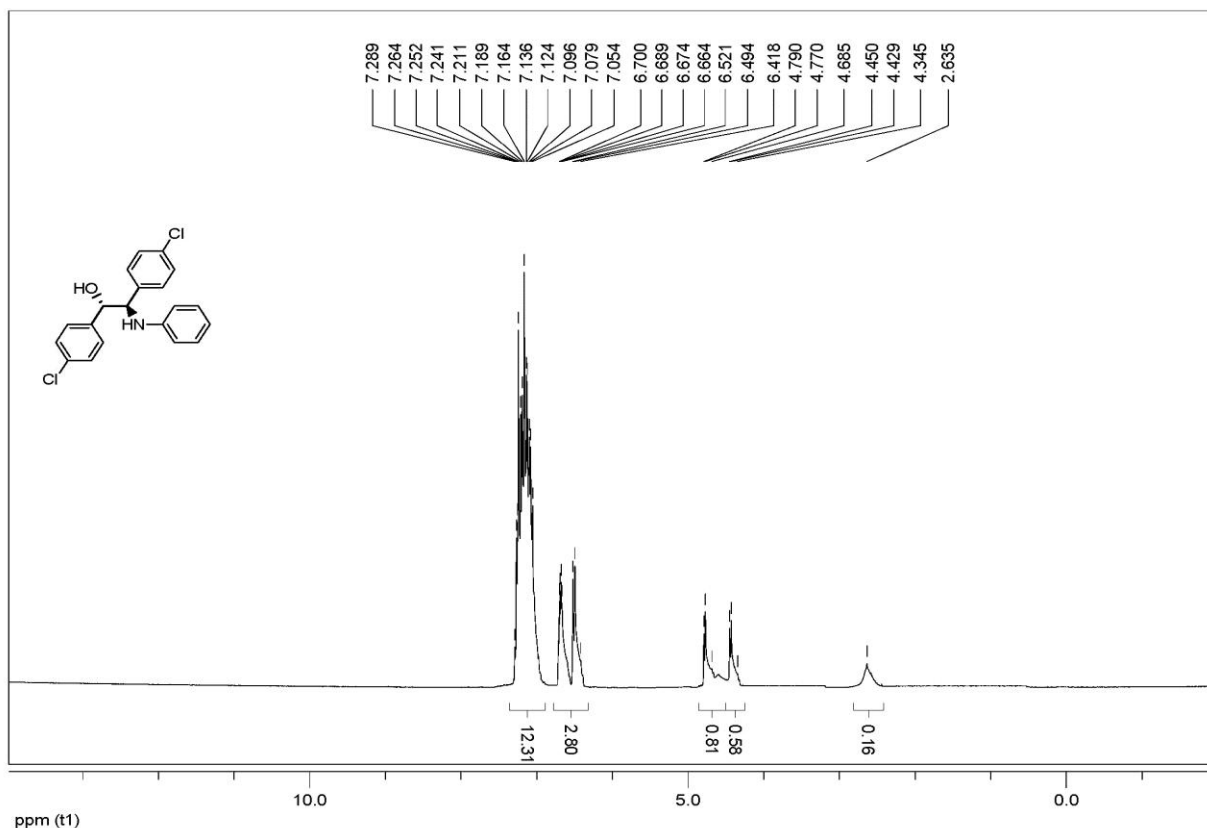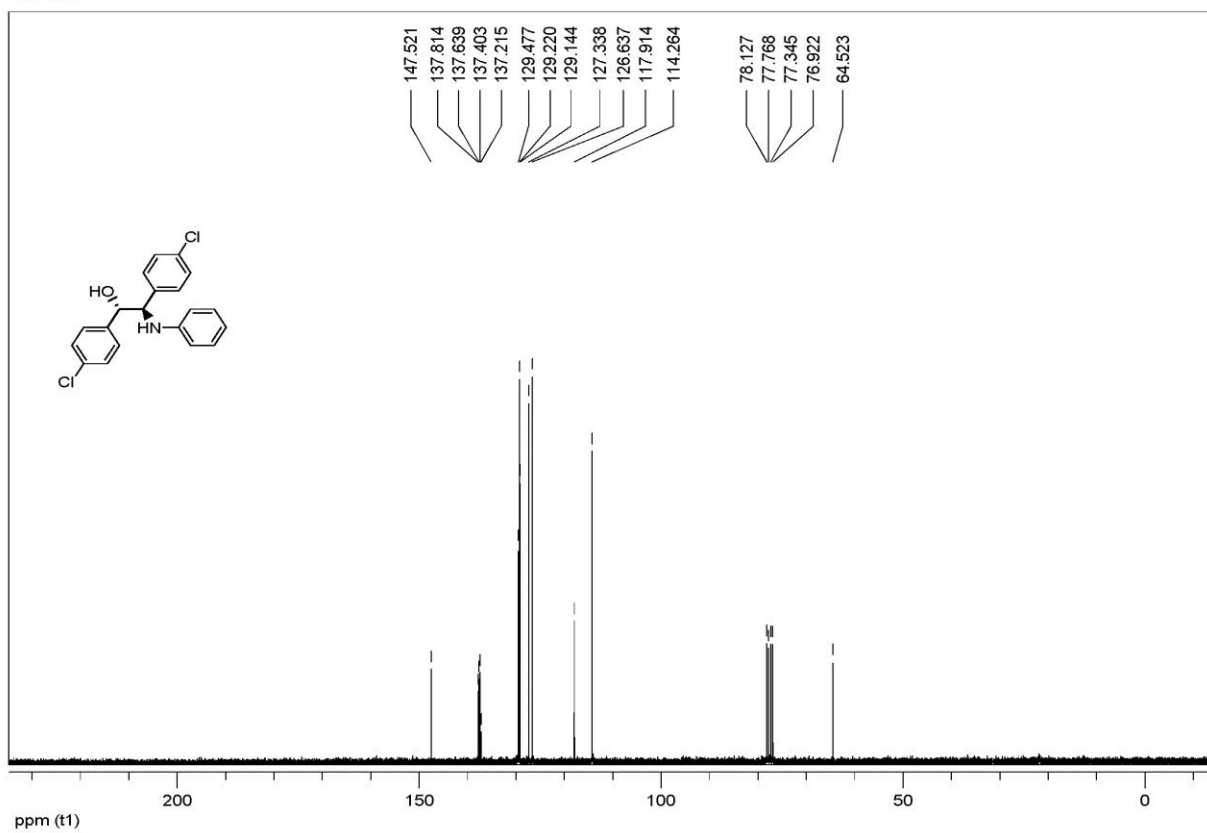



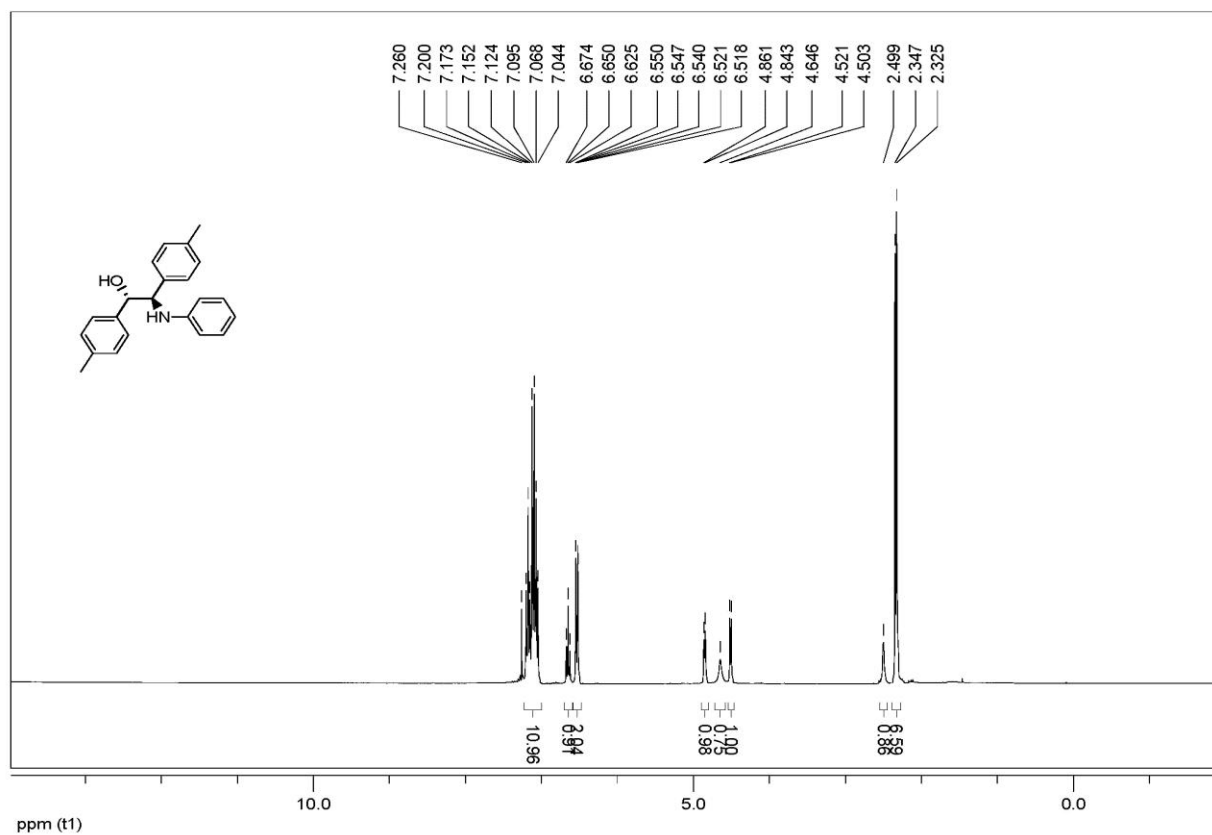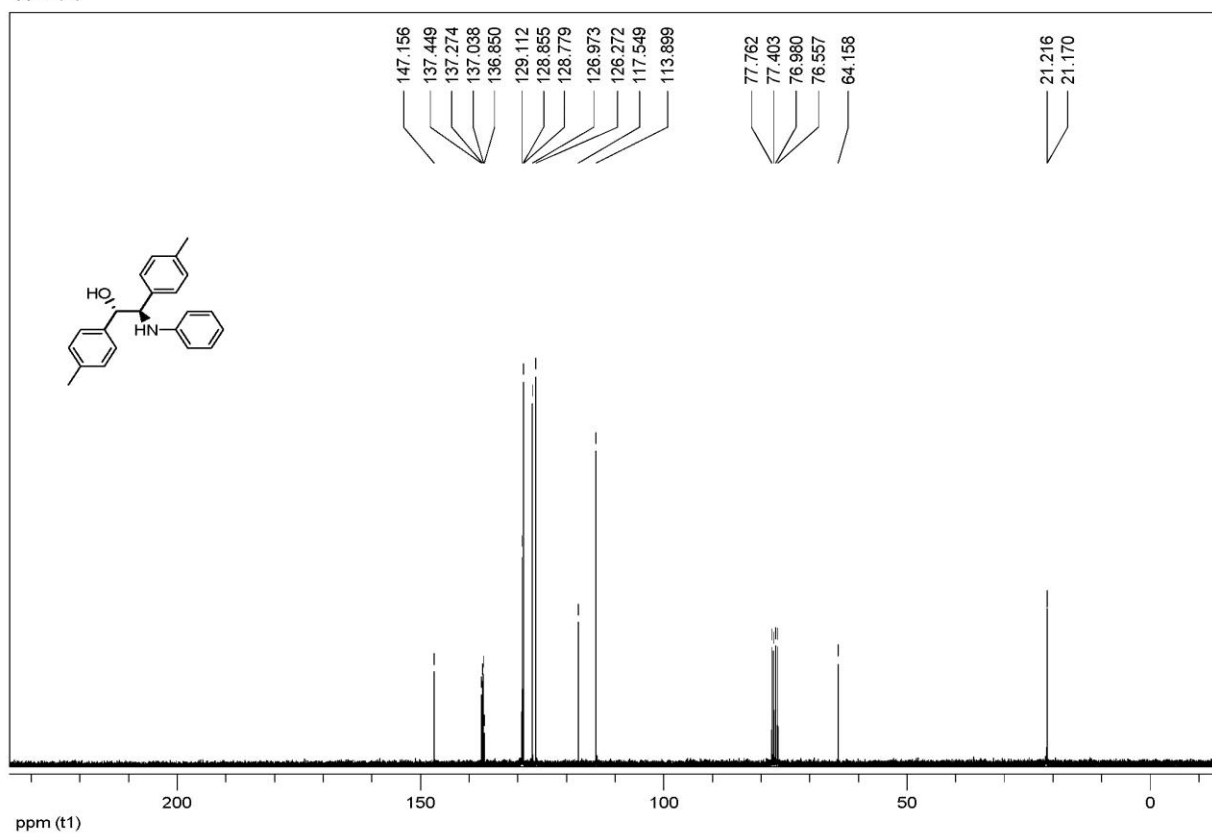

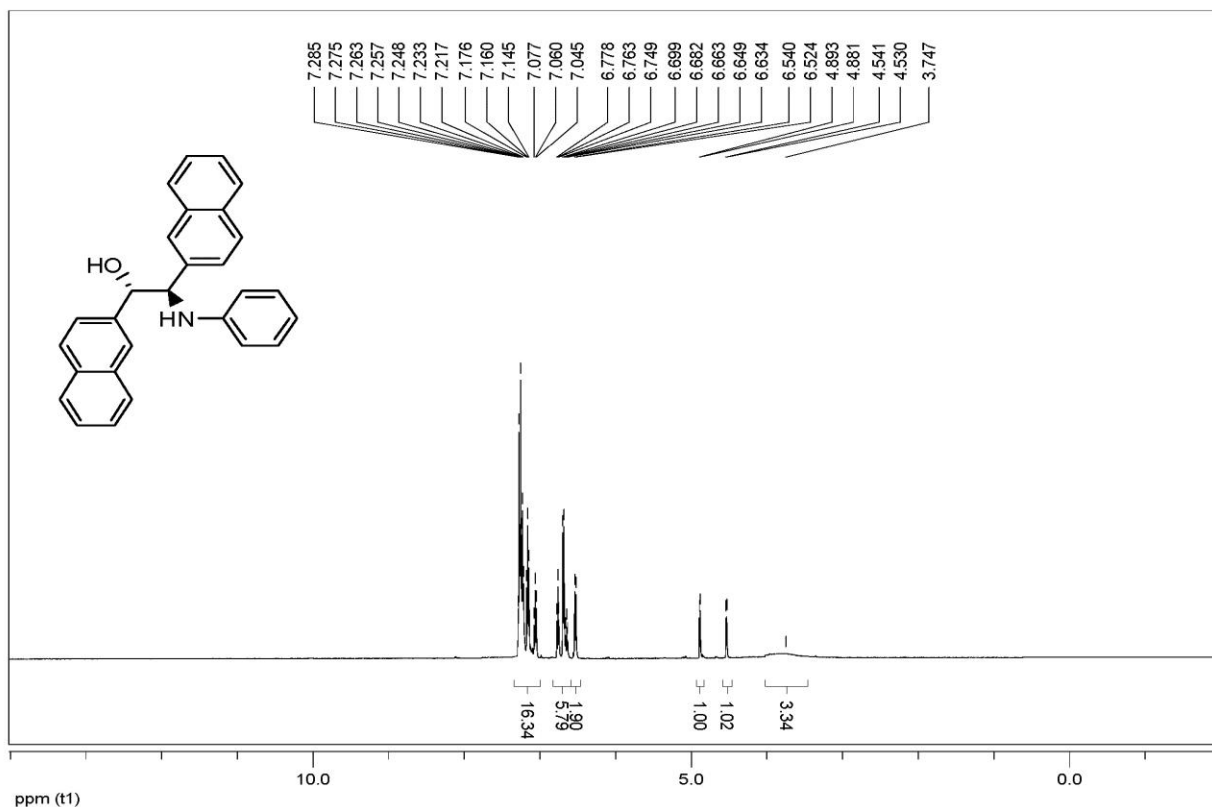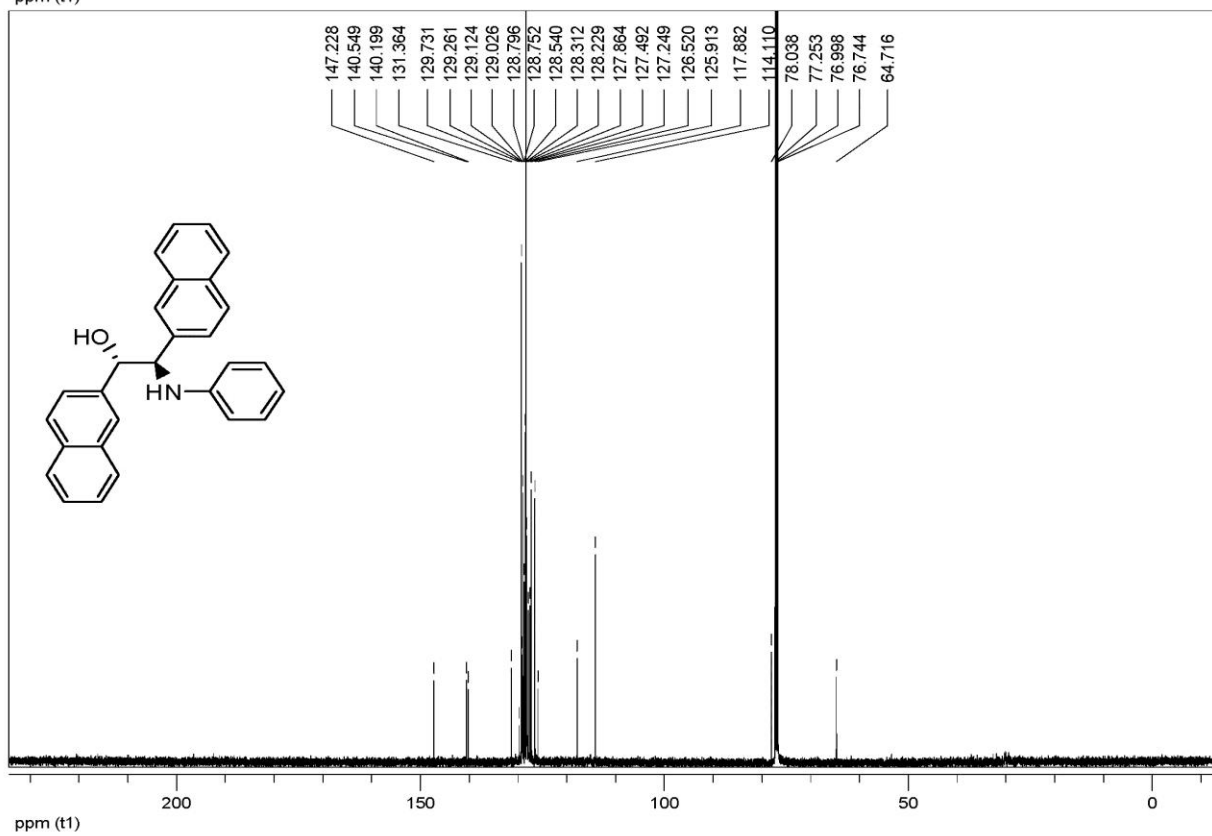

Method Name: C:\EZStart\Projects\Default\Methods\1-mt-17,IB,1ml,5%IPA,254nm.met  
Data: C:\Documents and  
Settings\Administrator\Desktop\murali\1-mt-17,IB,1ml,5%IPA,254nm-1

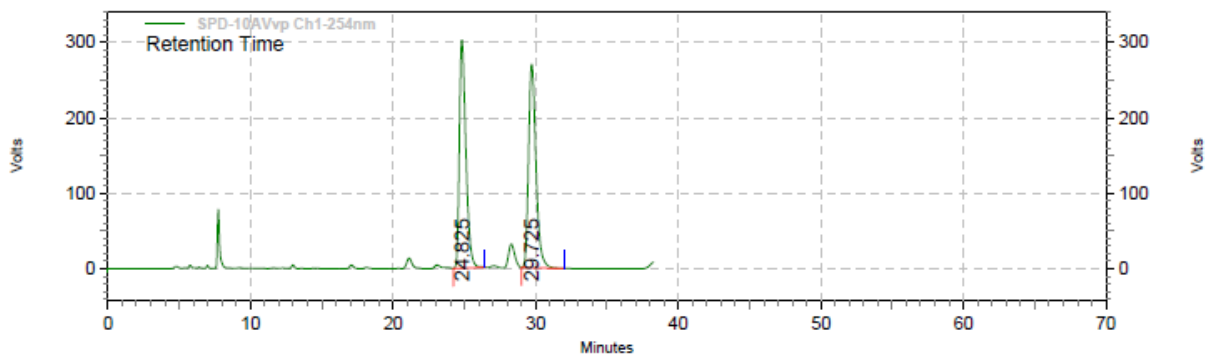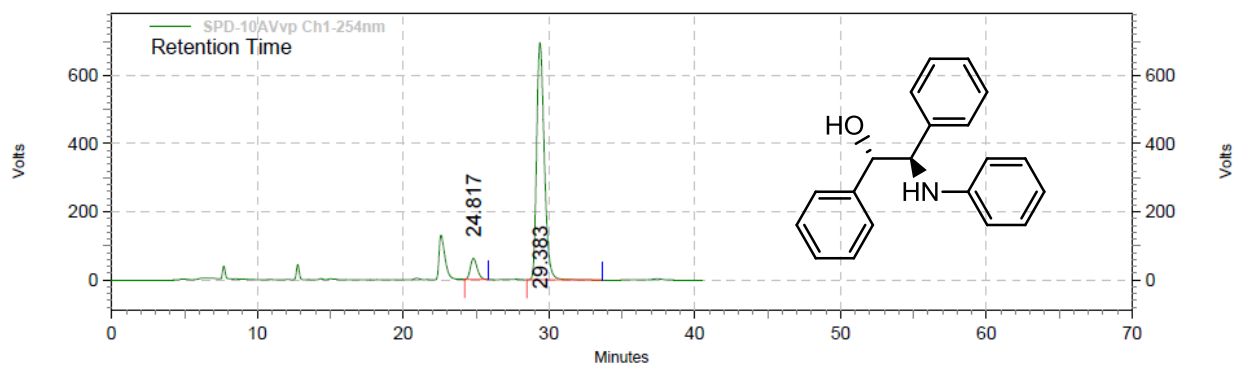

| Retention Time | Area     | Area % | Height | Height % |
|----------------|----------|--------|--------|----------|
| 24.817         | 2023375  | 7.37   | 61898  | 8.16     |
| 29.383         | 25422566 | 92.63  | 696407 | 91.84    |

**Method Name:** C:\EZStart\Projects\Default\Methods\1-mt-22,IB,1ml,5%IPA,254nm.met  
**Data:** C:\Documents and  
**Settings\Administrator\Desktop\murali\1-mt-22,IB,1ml,5%IPA,254nm**

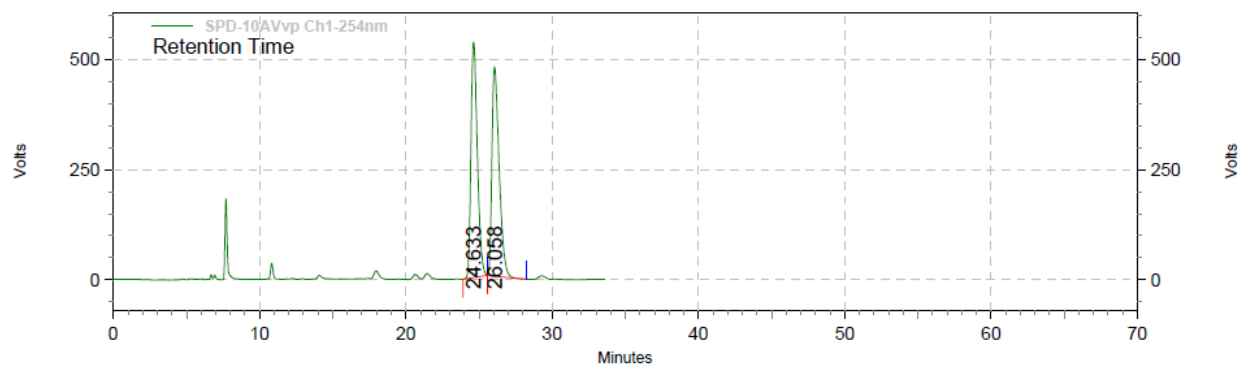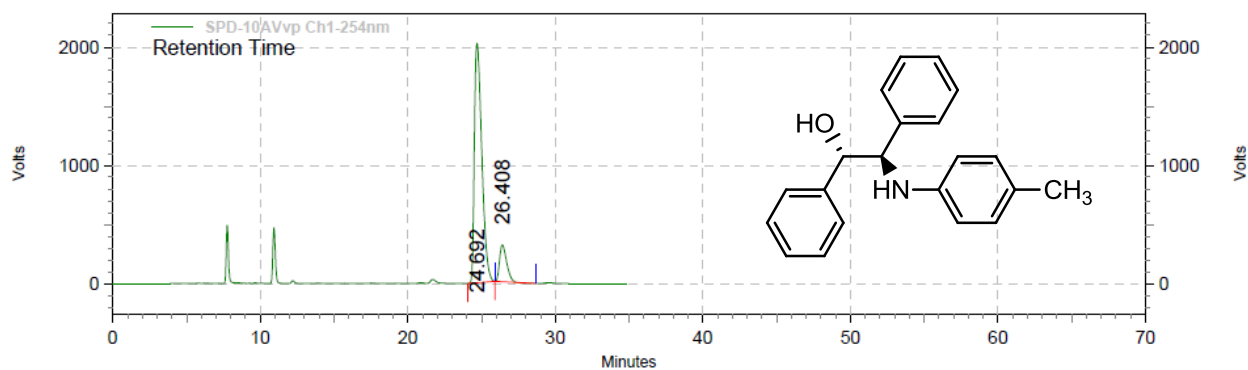

| Retention Time | Area     | Area % | Height  | Height % |
|----------------|----------|--------|---------|----------|
| 24.692         | 71062196 | 87.42  | 2023909 | 86.69    |
| 26.408         | 10229023 | 12.58  | 310782  | 13.31    |

**Method Name: C:\Documents and Settings\Administrator\Desktop\murali\1-mt-19,racemic,1ml,5%IPA,247nm.met**

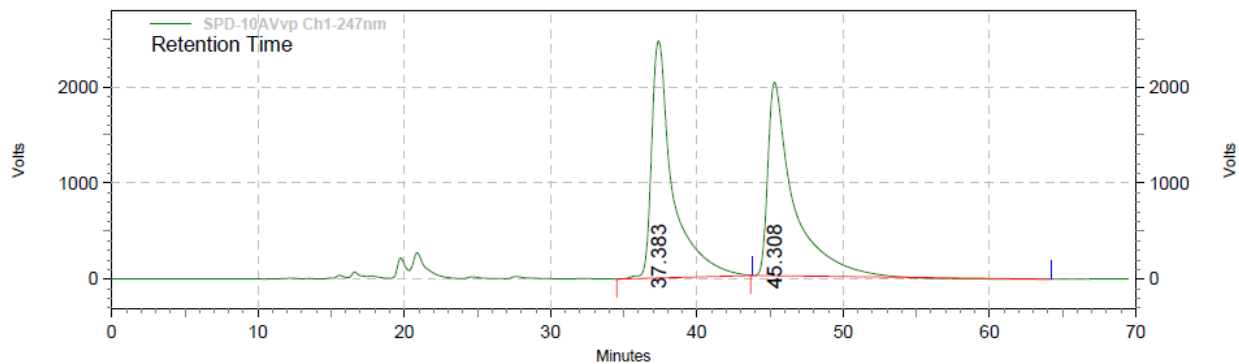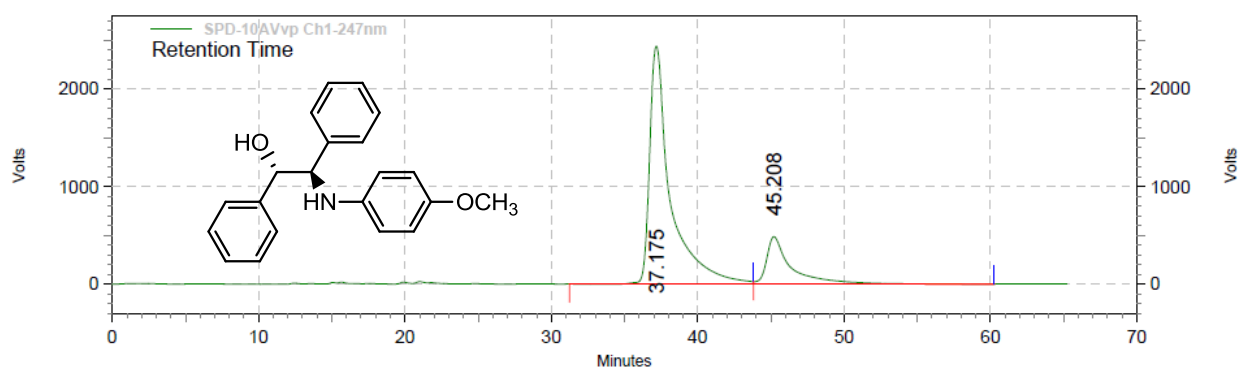

| Retention Time | Area      | Area % | Height  | Height % |
|----------------|-----------|--------|---------|----------|
| 37.175         | 240265769 | 80.89  | 2437578 | 83.40    |
| 45.208         | 56746737  | 19.11  | 485274  | 16.60    |

**Method Name:** C:\EZStart\Projects\Default\Methods\1-mt-21,IB,1ml,5%IPA,254nm.met  
**Data:** C:\Documents and  
**Settings\Administrator\Desktop\murali\1-mt-21,IB,1ml,5%IPA,254nm**

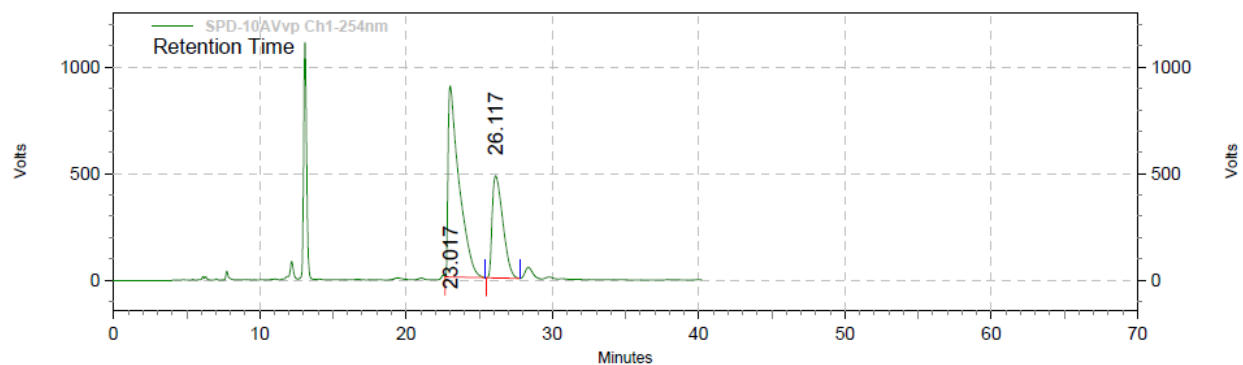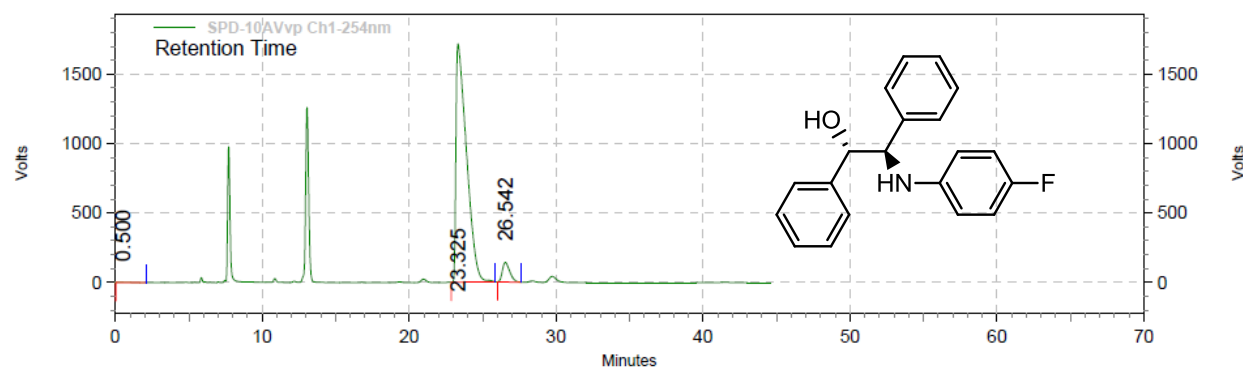

| Retention Time | Area     | Area % | Height  | Height % |
|----------------|----------|--------|---------|----------|
| 0.500          | 55640    | 0.06   | 981     | 0.05     |
| 23.325         | 85657368 | 94.45  | 1715248 | 92.36    |
| 26.542         | 4981399  | 5.49   | 140971  | 7.59     |

**Method Name: C:\Documents and Settings\Administrator\Desktop\murali\1-mt-20,racemic,1ml,5%IPA,247nm.met**

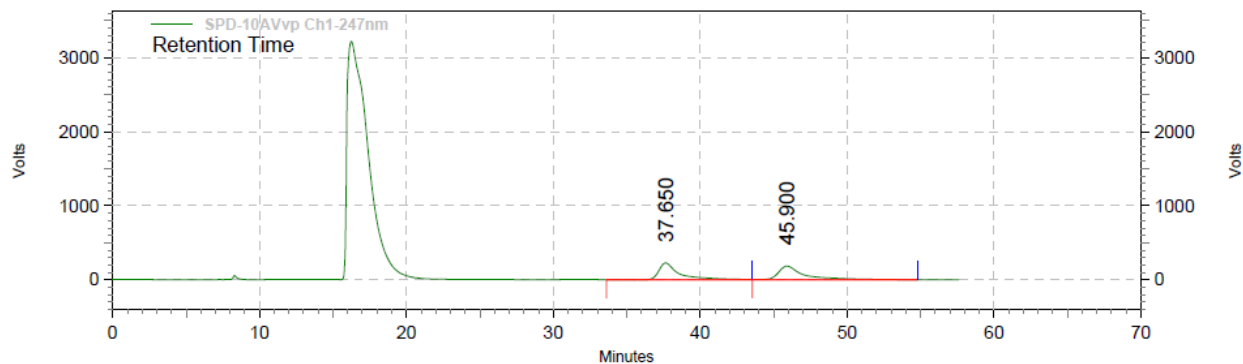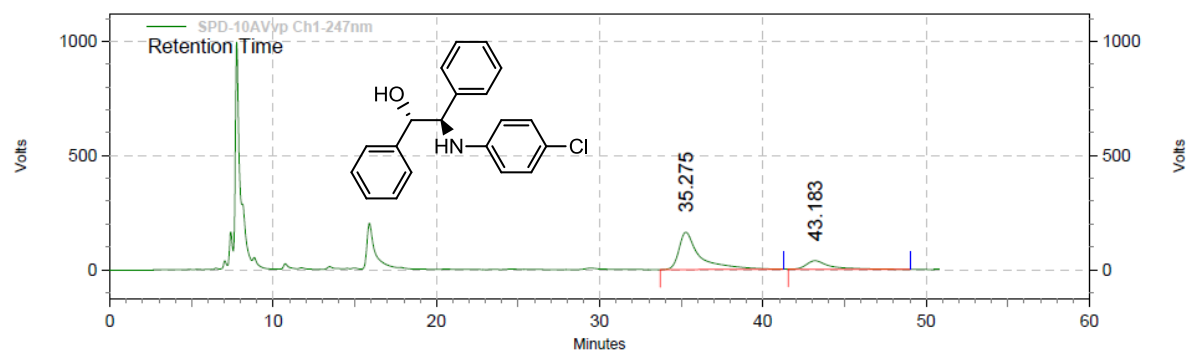

| Retention Time | Area     | Area % | Height | Height % |
|----------------|----------|--------|--------|----------|
| 35.275         | 14548898 | 79.11  | 163209 | 81.39    |
| 43.183         | 3841991  | 20.89  | 37323  | 18.61    |

Method Name: C:\EZStart\Projects\Default\Methods\1-mt-18,AD-H,1ml,10%IPA,254nm.met  
Data: C:\Documents and  
Settings\Administrator\Desktop\murali\1-mt-18,AD-H,1ml,10%IPA,254nm-1

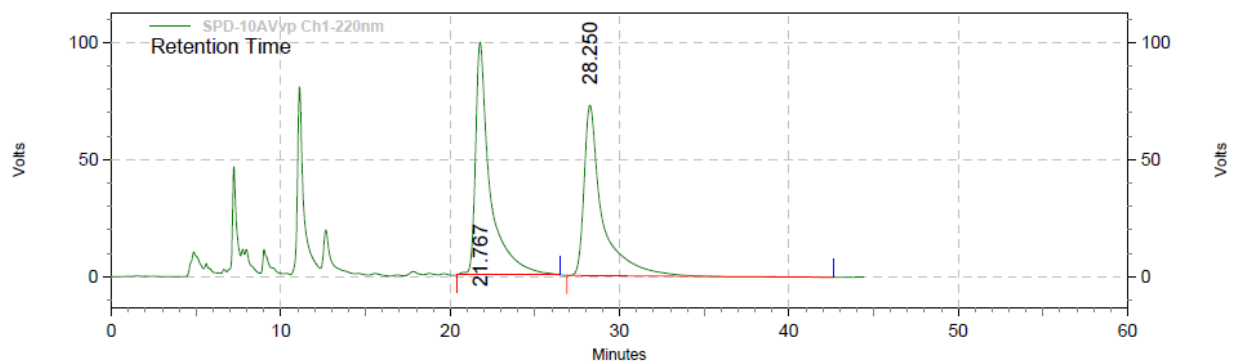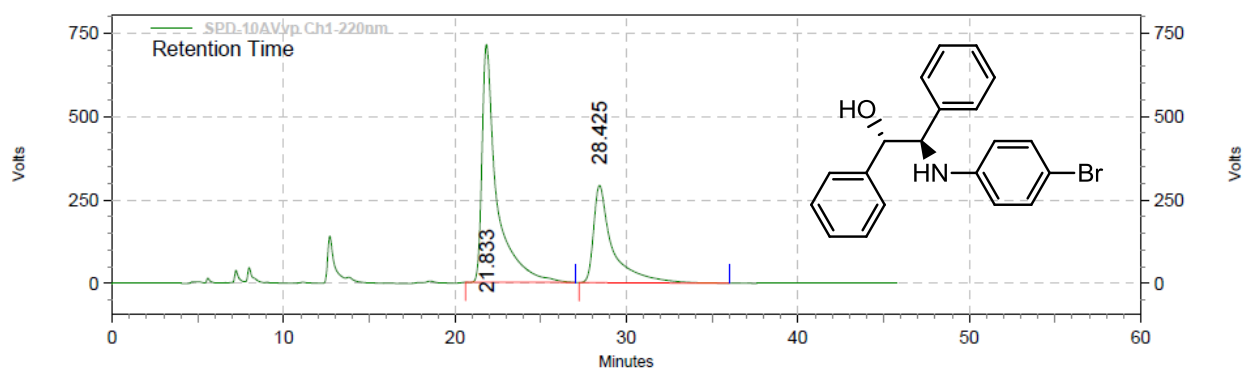

| Retention Time | Area     | Area % | Height | Height % |
|----------------|----------|--------|--------|----------|
| 21.833         | 42580921 | 65.47  | 711590 | 70.97    |
| 28.425         | 22455922 | 34.53  | 291098 | 29.03    |



**Method Name:** C:\EZStart\Projects\Default\Methods\1-mt-150,IB,1ml,5%IPA,254nm.met  
**Data:** C:\Documents and Settings\Administrator\Desktop\murali\1-mt-150,IB,1ml,5%IPA,254nm

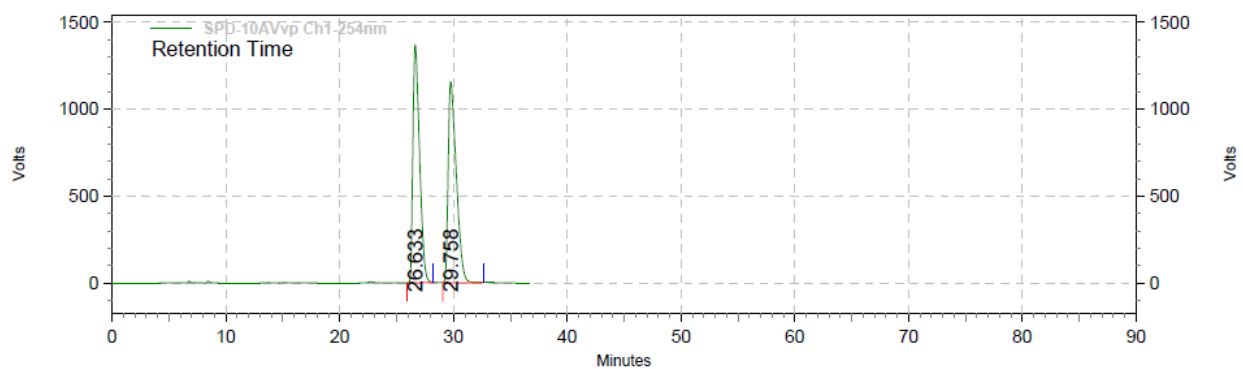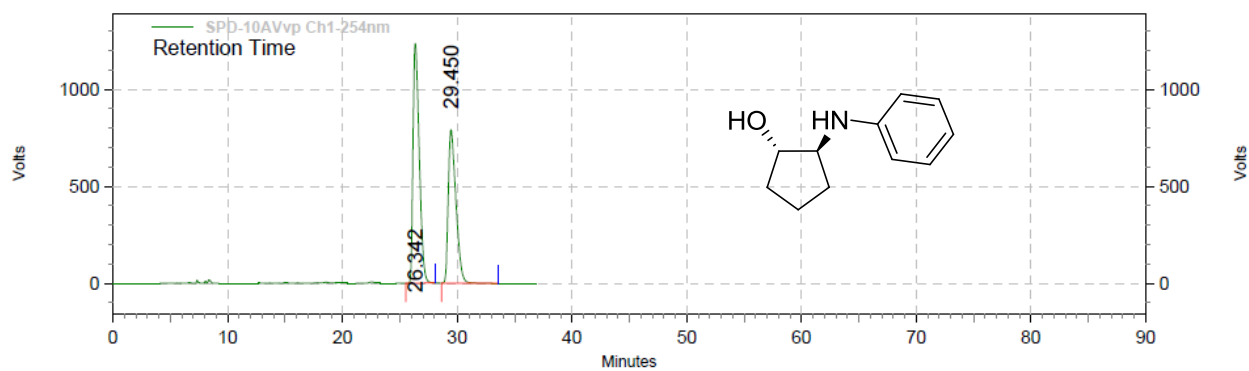

| Retention Time | Area     | Area % | Height  | Height % |
|----------------|----------|--------|---------|----------|
| 26.342         | 46597517 | 55.98  | 1234472 | 60.98    |
| 29.450         | 36649496 | 44.02  | 789888  | 39.02    |

Method Name: C:\EZStart\Projects\Default\Methods\1-mt-151,IB,1ml,5%IPA,254nm.met  
Data: C:\Documents and  
Settings\Administrator\Desktop\murali\1-mt-151,IB,1ml,5%IPA,254nm

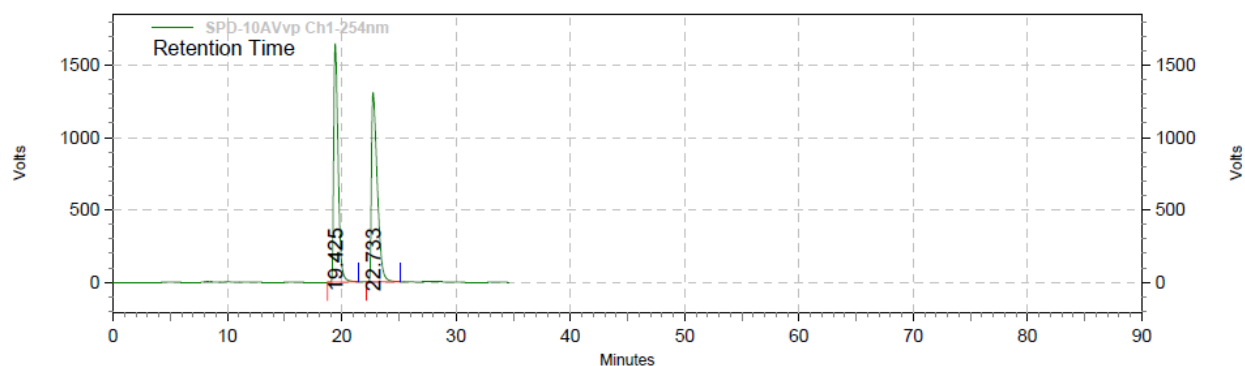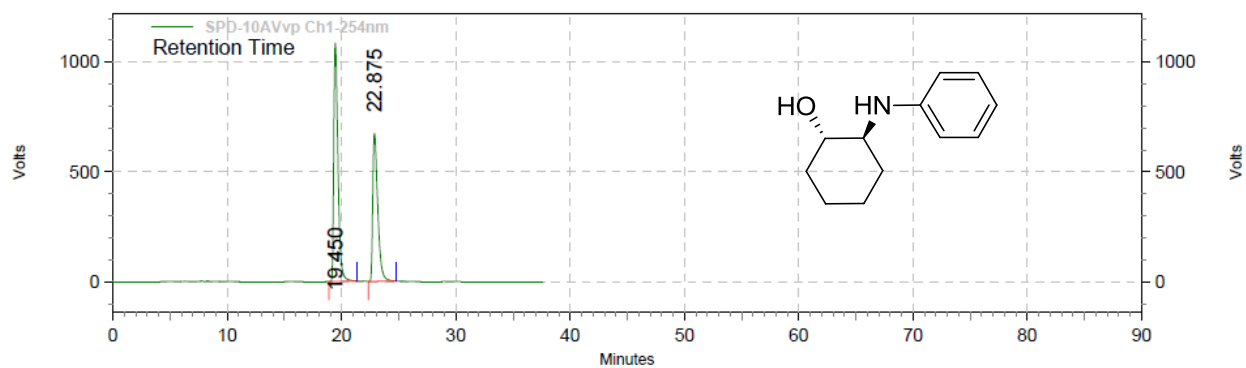

| Retention Time | Area     | Area % | Height  | Height % |
|----------------|----------|--------|---------|----------|
| 19.450         | 27678150 | 57.60  | 1086769 | 61.73    |
| 22.875         | 20376044 | 42.40  | 673656  | 38.27    |

**Method Name:** C:\EZStart\Projects\Default\Methods\2-mt-189,IB,1ml,5%IPA,254nm.met  
**Data:** C:\Documents and  
**Settings\Administrator\Desktop\murali\2-mt-189,IB,1ml,5%IPA,254nm**

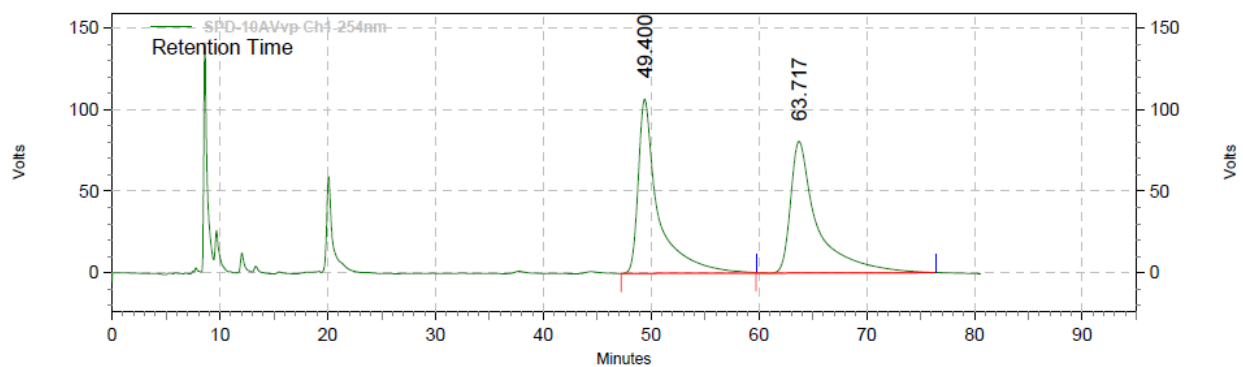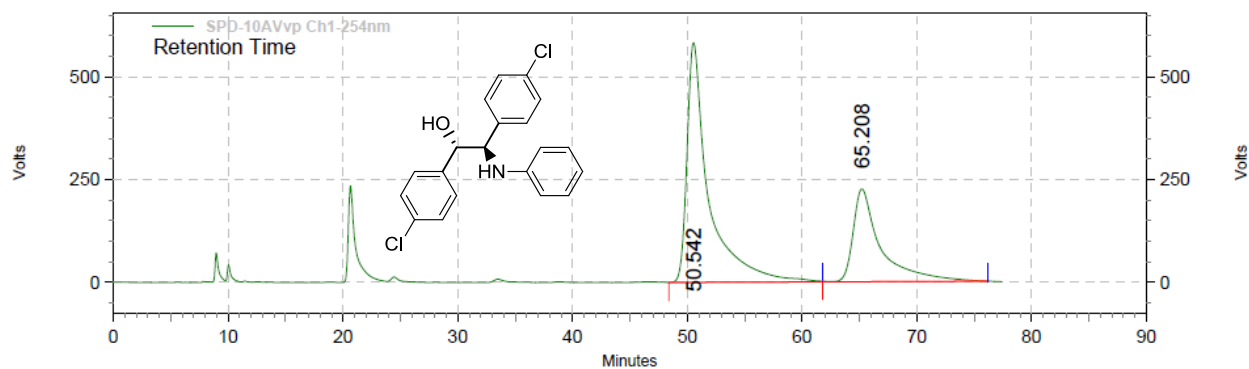

| Retention Time | Area     | Area % | Height | Height % |
|----------------|----------|--------|--------|----------|
| 50.542         | 76689940 | 67.13  | 583233 | 72.09    |
| 65.208         | 37555833 | 32.87  | 225758 | 27.91    |

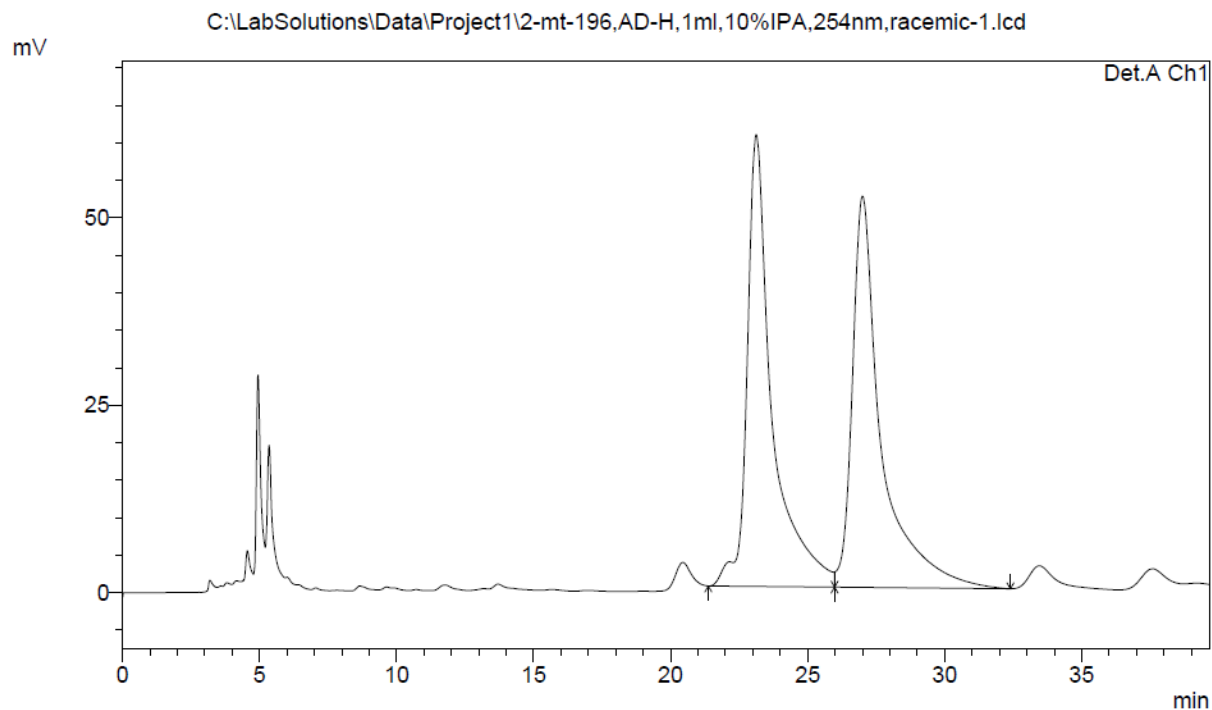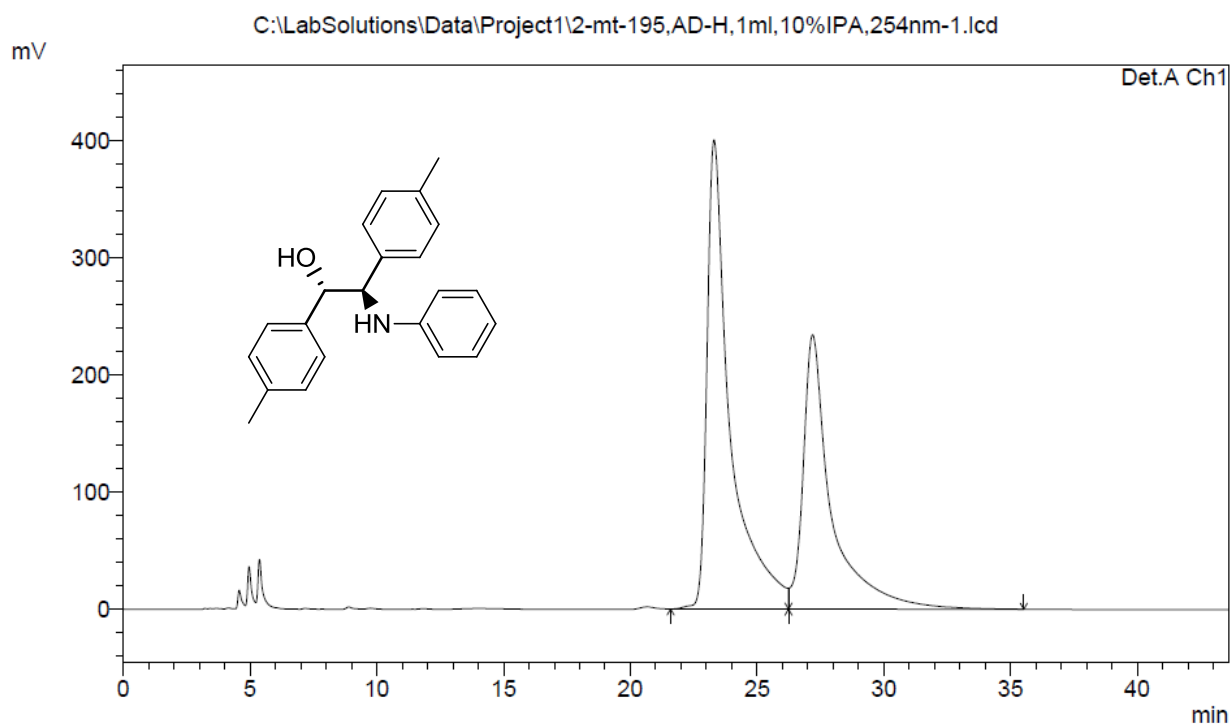

Detector A Ch1 254nm

| Peak# | Ret. Time | Area     | Height | Area % | Height % |
|-------|-----------|----------|--------|--------|----------|
| 1     | 23.301    | 25461974 | 400441 | 58.473 | 63.100   |
| 2     | 27.190    | 18082853 | 234167 | 41.527 | 36.900   |

Method Name: C:\EZStart\Projects\Default\Methods\2-mt-193,AD-H,1ml,10%IPA,254nm.met  
Data: C:\Documents and  
Settings\Administrator\Desktop\murali\2-mt-193,AD-H,1ml,10%IPA,254nm,racemic

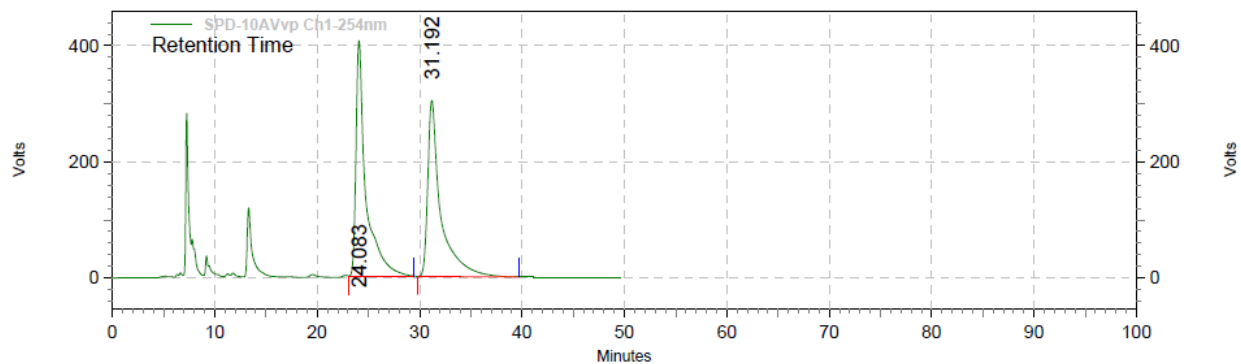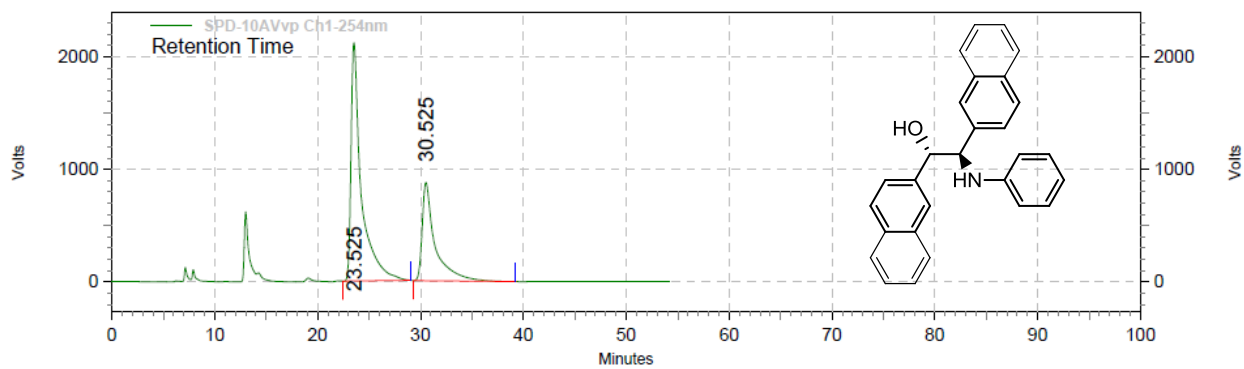

| Retention Time | Area      | Area % | Height  | Height % |
|----------------|-----------|--------|---------|----------|
| 23.525         | 147144569 | 65.95  | 2116099 | 70.81    |
| 30.525         | 75972361  | 34.05  | 872152  | 29.19    |
